# Supplementary material for: Myrtucomvalones A–C, three unusual triketone–sesquiterpene adducts from the leaves of Myrtus communis ‘Variegata’
Source: Royal Society of Chemistry journal article supplement (doi:10.1039/c7ra02260c), 2017-01-01
Supplement: c7ra02260c1.pdf [file c7ra02260c1.pdf]

**Myrtucomvalones A-C, three unusual triketone-sesquiterpene adducts from the leaves of *Myrtus communis* ‘Variegata’**

Ming Chen <sup>‡a,b</sup>, Li-Feng Chen <sup>‡b</sup>, Man-Mei Li <sup>b,c</sup>, Ni-Ping Li <sup>b</sup>, Jia-Qing Cao <sup>b</sup>, Ying Wang <sup>b,c</sup>, Yao-Lan Li <sup>b,c</sup>, Lei Wang <sup>b,c,\*</sup>, Wen-Cai Ye <sup>a,b,c,\*</sup>

<sup>a</sup> *Department of Natural Medicinal Chemistry, China Pharmaceutical University, Nanjing 210009, People’s Republic of China*

<sup>b</sup> *Institute of Traditional Chinese Medicine & Natural Products, and JNU-HKUST Joint Laboratory for Neuroscience & Innovative Drug Research, College of Pharmacy, Jinan University, Guangzhou 510632, People’s Republic of China*

<sup>c</sup> *Guangdong Province Key Laboratory of Pharmacodynamic Constituents of TCM and New Drugs Research, Jinan University, Guangzhou 510632, People’s Republic of China*

---

\* Corresponding authors. Tel./fax: + 86 20 85221559.

E-mail addresses: [chywc@aliyun.com](mailto:chywc@aliyun.com) (W.-C. Ye), [cpuwanglei@126.com](mailto:cpuwanglei@126.com) (L. Wang)

## List of Supporting Information

| Contents                                                                      | Page |
|-------------------------------------------------------------------------------|------|
| 1. Single crystal X-ray crystallographic analysis of <b>1</b> and <b>2</b>    | 1-3  |
| 2. UV, IR, HR-ESI-MS, CD and NMR spectra of <b>1-3</b>                        | 3-19 |
| UV spectrum of <b>1</b> in CH <sub>3</sub> OH                                 | 4    |
| IR (KBr disc) spectrum of <b>1</b>                                            | 4    |
| HR-ESI-MS spectrum of <b>1</b>                                                | 5    |
| <sup>1</sup> H NMR spectrum of <b>1</b> (500 MHz, CDCl <sub>3</sub> )         | 5    |
| <sup>13</sup> C NMR spectrum of <b>1</b> (125 MHz, CDCl <sub>3</sub> )        | 6    |
| DEPT-135 spectrum of <b>1</b> (CDCl <sub>3</sub> )                            | 6    |
| <sup>1</sup> H- <sup>1</sup> H COSY spectrum of <b>1</b> (CDCl <sub>3</sub> ) | 7    |
| HSQC spectrum of <b>1</b> (CDCl <sub>3</sub> )                                | 7    |
| HMBC spectrum of <b>1</b> (CDCl <sub>3</sub> )                                | 8    |
| NOESY spectrum of <b>1</b> (CDCl <sub>3</sub> )                               | 8    |
| UV spectrum of <b>2</b> in CH <sub>3</sub> OH                                 | 9    |
| IR (KBr disc) spectrum of <b>2</b>                                            | 9    |
| HR-ESI-MS spectrum of <b>2</b>                                                | 10   |
| CD spectrum of <b>2</b> in CH <sub>3</sub> CN                                 | 10   |
| <sup>1</sup> H NMR spectrum of <b>2</b> (500 MHz, CDCl <sub>3</sub> )         | 11   |
| <sup>13</sup> C NMR spectrum of <b>2</b> (125 MHz, CDCl <sub>3</sub> )        | 11   |
| DEPT-135 spectrum of <b>2</b> (CDCl <sub>3</sub> )                            | 12   |
| <sup>1</sup> H- <sup>1</sup> H COSY spectrum of <b>2</b> (CDCl <sub>3</sub> ) | 12   |
| HSQC spectrum of <b>2</b> (CDCl <sub>3</sub> )                                | 13   |
| HMBC spectrum of <b>2</b> (CDCl <sub>3</sub> )                                | 13   |
| NOESY spectrum of <b>2</b> (CDCl <sub>3</sub> )                               | 14   |
| UV spectrum of <b>3</b> in CH <sub>3</sub> OH                                 | 14   |
| IR (KBr disc) spectrum of <b>3</b>                                            | 15   |
| HR-ESI-MS spectrum of <b>3</b>                                                | 15   |
| CD spectrum of <b>3</b> in CH <sub>3</sub> CN                                 | 16   |

|                                                                               |       |
|-------------------------------------------------------------------------------|-------|
| <sup>1</sup> H NMR spectrum of <b>3</b> (500 MHz, CDCl <sub>3</sub> )         | 16    |
| <sup>13</sup> C NMR spectrum of <b>3</b> (125 MHz, CDCl <sub>3</sub> )        | 17    |
| DEPT-135 spectrum of <b>3</b> (CDCl <sub>3</sub> )                            | 17    |
| <sup>1</sup> H- <sup>1</sup> H COSY spectrum of <b>3</b> (CDCl <sub>3</sub> ) | 18    |
| HSQC spectrum of <b>3</b> (CDCl <sub>3</sub> )                                | 18    |
| HMBC spectrum of <b>3</b> (CDCl <sub>3</sub> )                                | 19    |
| NOESY spectrum of <b>3</b> (CDCl <sub>3</sub> )                               | 19    |
| 3. Purity analysis of <b>1-7</b> for biological test                          | 20-24 |
| HPLC analysis of <b>1</b>                                                     | 20    |
| HPLC analysis 3D spectrum of <b>1</b>                                         | 20    |
| HPLC analysis of <b>2</b>                                                     | 21    |
| HPLC analysis 3D spectrum of <b>2</b>                                         | 21    |
| HPLC analysis of <b>3</b>                                                     | 21    |
| HPLC analysis 3D spectrum of <b>3</b>                                         | 22    |
| HPLC analysis of <b>4</b>                                                     | 22    |
| HPLC analysis 3D spectrum of <b>4</b>                                         | 22    |
| HPLC analysis of <b>5</b>                                                     | 23    |
| HPLC analysis 3D spectrum of <b>5</b>                                         | 23    |
| HPLC analysis of <b>6</b>                                                     | 23    |
| HPLC analysis 3D spectrum of <b>6</b>                                         | 24    |
| HPLC analysis of <b>7</b>                                                     | 24    |
| HPLC analysis 3D spectrum of <b>7</b>                                         | 24    |

## 1. Single crystal X-ray crystallographic analysis of 1 and 2

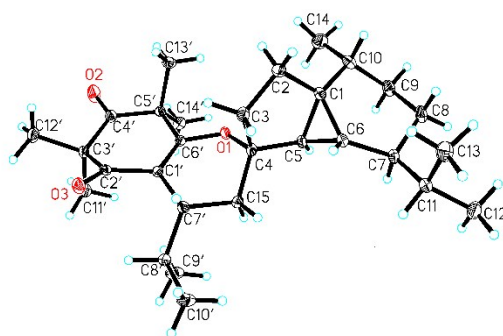

**Fig. S1** X-ray crystal structure of **1**

Crystallographic data for **1** have been deposited with the Cambridge Crystallographic Data Centre as supplementary publication no. CCDC 1529330. Copies of the data can be obtained, free of charge, on application to the Director, CCDC, 12 Union Road, Cambridge CB2 IEZ, UK (fax: +44-(0)1223-336033 or email: [deposit@ccdc.cam.ac.uk](mailto:deposit@ccdc.cam.ac.uk)).

**Table S1** Crystal data and structure refinement for **1**

|                               |                                                                                                                                 |
|-------------------------------|---------------------------------------------------------------------------------------------------------------------------------|
| Identification code           | 20160910-o4-166-195-5-2                                                                                                         |
| Empirical formula             | C <sub>29</sub> H <sub>44</sub> O <sub>3</sub>                                                                                  |
| Formula weight                | 440.64                                                                                                                          |
| Temperature                   | 293(2) K                                                                                                                        |
| Wavelength                    | 1.54178 Å                                                                                                                       |
| Crystal system, space group   | orthorhombic, <i>P</i> 2 <sub>1</sub> 2 <sub>1</sub> 2 <sub>1</sub>                                                             |
| Unit cell dimensions          | <i>a</i> = 6.0056(10) Å, $\alpha$ = 90°.<br><i>b</i> = 18.0532(4) Å, $\beta$ = 90°.<br><i>c</i> = 23.3138(5) Å, $\gamma$ = 90°. |
| Volume                        | 2527.69(9) Å <sup>3</sup>                                                                                                       |
| <i>Z</i> , Calculated density | 4, 1.158 Mg/m <sup>3</sup>                                                                                                      |
| Absorption coefficient        | 0.561 mm <sup>-1</sup>                                                                                                          |
| <i>F</i> (000)                | 968                                                                                                                             |

|                                   |                                             |
|-----------------------------------|---------------------------------------------|
| Crystal size                      | 0.45 × 0.33 × 0.23 mm                       |
| Theta range for data collection   | 4.500 to 62.854°                            |
| Limiting indices                  | -6 ≤ h ≤ 5, -20 ≤ k ≤ 20, -26 ≤ l ≤ 26      |
| Reflections collected / unique    | 20350 / 4034 [R(int) = 0.0485]              |
| Completeness to theta = 62.85     | 99.70%                                      |
| Absorption correction             | Semi-empirical from equivalents             |
| Max. and min. transmission        | 1.000 and 0.563                             |
| Refinement method                 | Full-matrix least-squares on F <sup>2</sup> |
| Data / restraints / parameters    | 4034 / 0 / 299                              |
| Goodness-of-fit on F <sup>2</sup> | 1.063                                       |
| Final R indices [I > 2σ(I)]       | R1 = 0.0299, wR2 = 0.0750                   |
| R indices (all data)              | R1 = 0.0327, wR2 = 0.0779                   |
| Absolute structure parameter      | -0.05(11)                                   |
| Largest diff. peak and hole       | 0.134 and -0.130 e.Å                        |

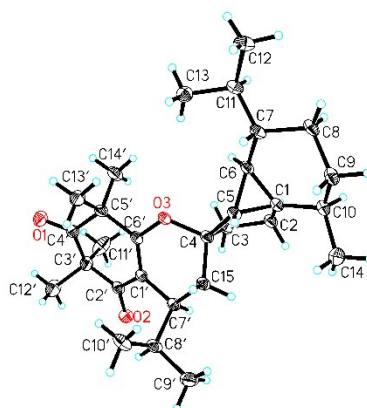

**Fig. S2** X-ray crystal structure of **2**

Crytallographic data for **2** have been deposited with the Cambridge Crystallographic Data Centre as supplementary publication no. CCDC 1529333. Copies of the data can be obtained, free of charge, on application to the Director, CCDC, 12 Union Road, Cambridge CB2 IEZ, UK (fax: +44-(0)1223-336033 or email: [deposit@ccdc.cam.ac.uk](mailto:deposit@ccdc.cam.ac.uk)).

**Table S2** Crystal data and structure refinement for **2**

|                                   |                                                                                                                         |
|-----------------------------------|-------------------------------------------------------------------------------------------------------------------------|
| Identification code               | exp_119                                                                                                                 |
| Empirical formula                 | C <sub>29</sub> H <sub>44</sub> O <sub>3</sub>                                                                          |
| Formula weight                    | 440.64                                                                                                                  |
| Temperature                       | 100.01(10) K                                                                                                            |
| Wavelength                        | 1.54184 Å                                                                                                               |
| Crystal system, space group       | triclinic, <i>P</i> -1                                                                                                  |
| Unit cell dimensions              | a = 9.7468(7) Å, alpha = 107.318(7)°.<br>b = 10.0413(9) Å, beta = 95.676(6)°.<br>c = 14.7257(9) Å, gamma = 104.090(7)°. |
| Volume                            | 1311.43(18) Å <sup>3</sup>                                                                                              |
| Z, Calculated density             | 2, 1.116 Mg/m <sup>3</sup>                                                                                              |
| Absorption coefficient            | 0.541 mm <sup>-1</sup>                                                                                                  |
| F(000)                            | 484                                                                                                                     |
| Crystal size                      | 0.30 × 0.20 × 0.20 mm                                                                                                   |
| Theta range for data collection   | 4.760 to 73.610°                                                                                                        |
| Limiting indices                  | -8 ≤ h ≤ 11, -12 ≤ k ≤ 11, -18 ≤ l ≤ 18                                                                                 |
| Reflections collected / unique    | 8553 / 5070 [R(int) = 0.0556]                                                                                           |
| Completeness to theta = 66.97     | 99.66 %                                                                                                                 |
| Absorption correction             | Semi-empirical from equivalents                                                                                         |
| Max. and min. transmission        | 1.000 and 0.703                                                                                                         |
| Refinement method                 | Full-matrix least-squares on F <sup>2</sup>                                                                             |
| Data / restraints / parameters    | 5070 / 0 / 298                                                                                                          |
| Goodness-of-fit on F <sup>2</sup> | 1.032                                                                                                                   |
| Final R indices [I > 2σ(I)]       | R1 = 0.0774, wR2 = 0.2304                                                                                               |
| R indices (all data)              | R1 = 0.0985, wR2 = 0.2426                                                                                               |
| Largest diff. peak and hole       | 0.370 and -0.304 e.Å                                                                                                    |

## 2. UV, IR, HR-ESI-MS, CD and NMR spectra of 1-3

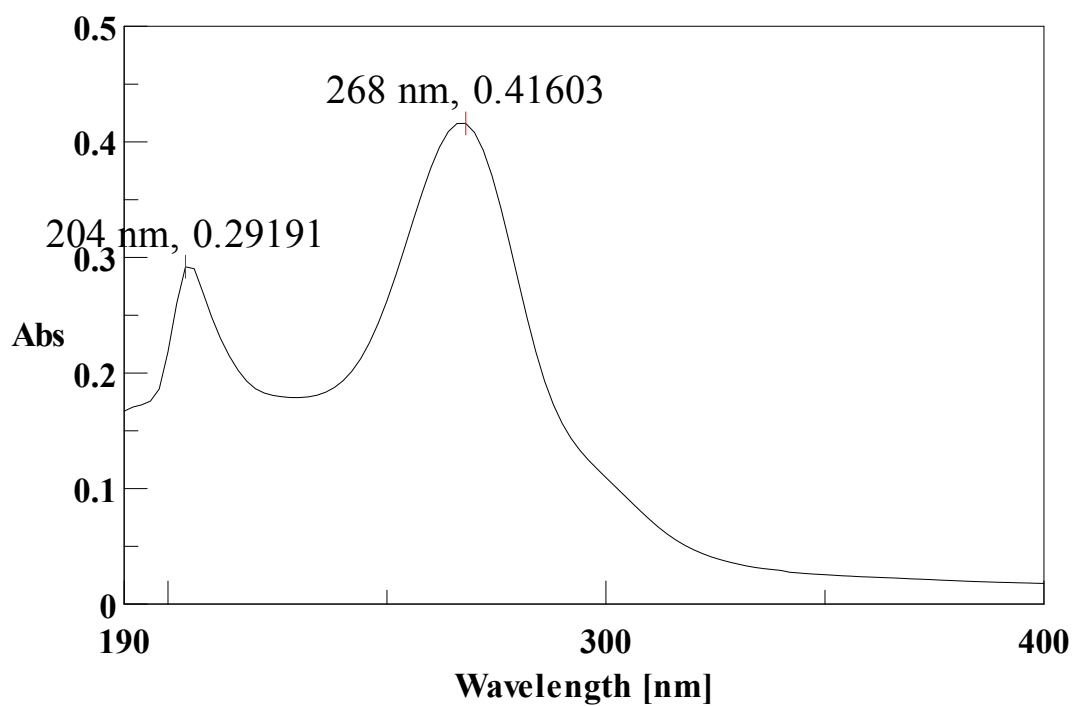

Fig. S3 UV spectrum of 1 in CH<sub>3</sub>OH

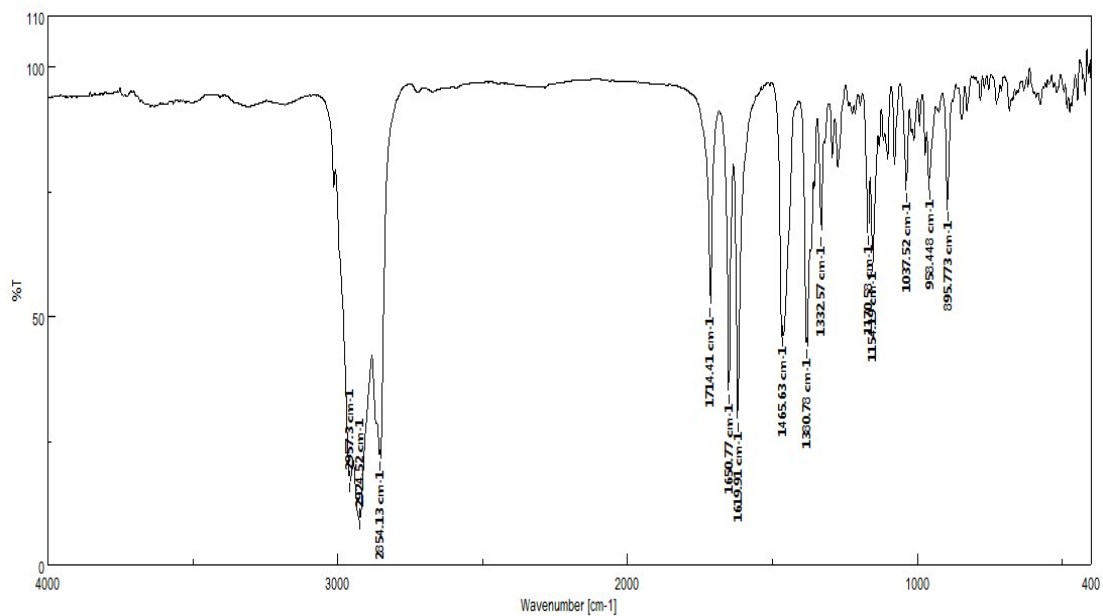

Fig. S4 IR (KBr disc) spectrum of 1

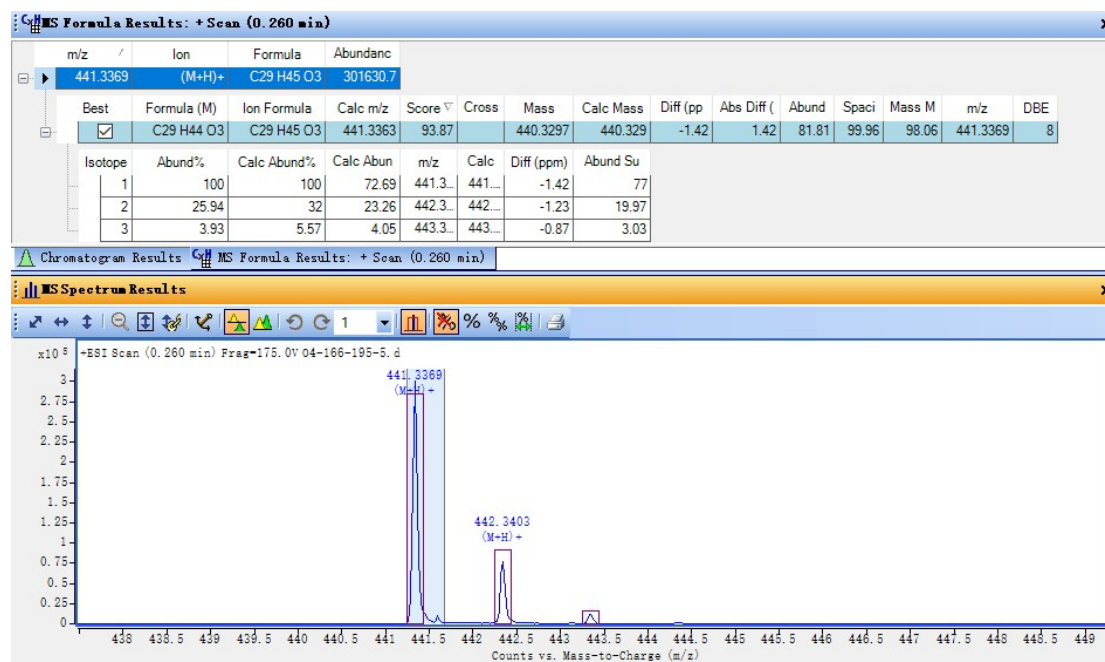

Fig. S5 HR-ESI-MS spectrum of 1

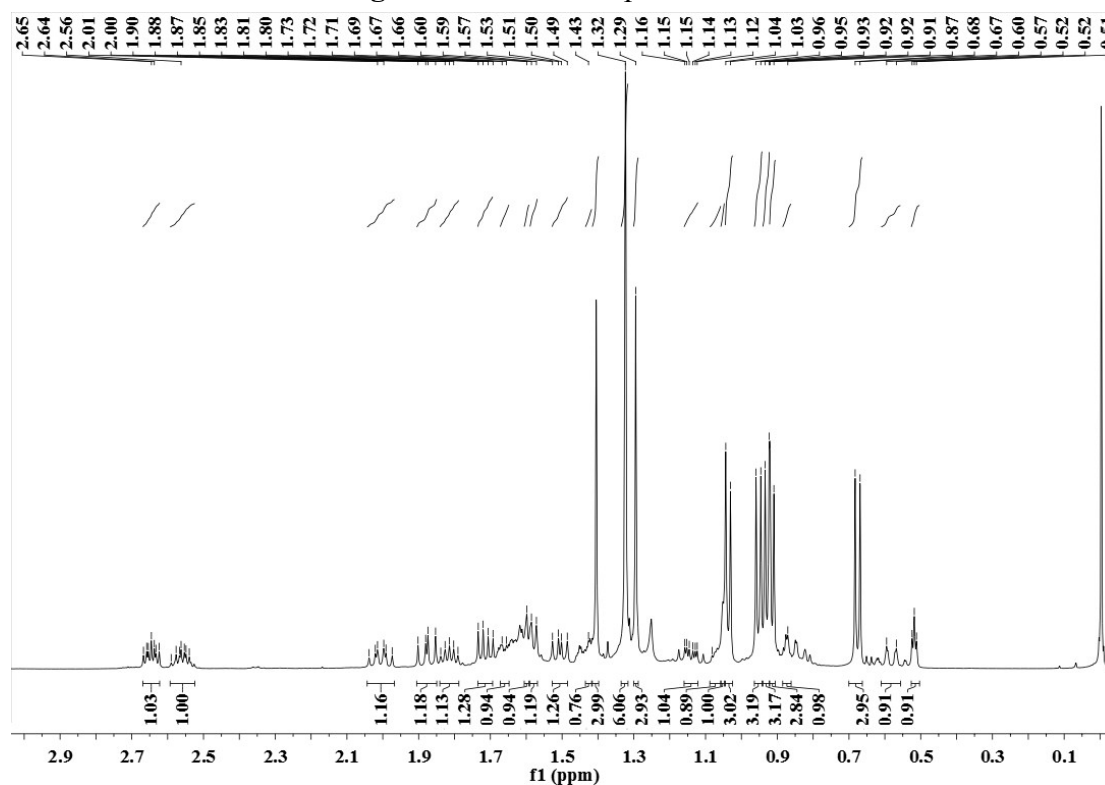

Fig. S6 <sup>1</sup>H NMR spectrum of 1 (500 MHz, CDCl<sub>3</sub>)



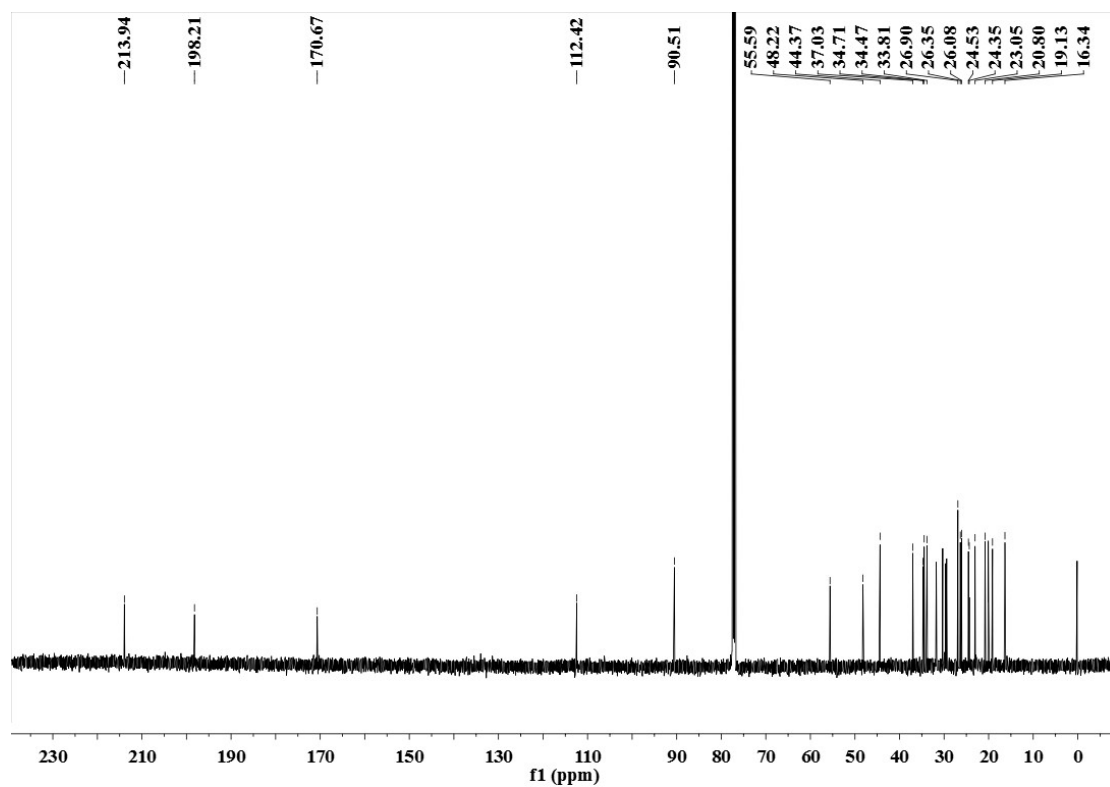

Fig. S7  $^{13}\text{C}$  NMR spectrum of **1** (125 MHz,  $\text{CDCl}_3$ )

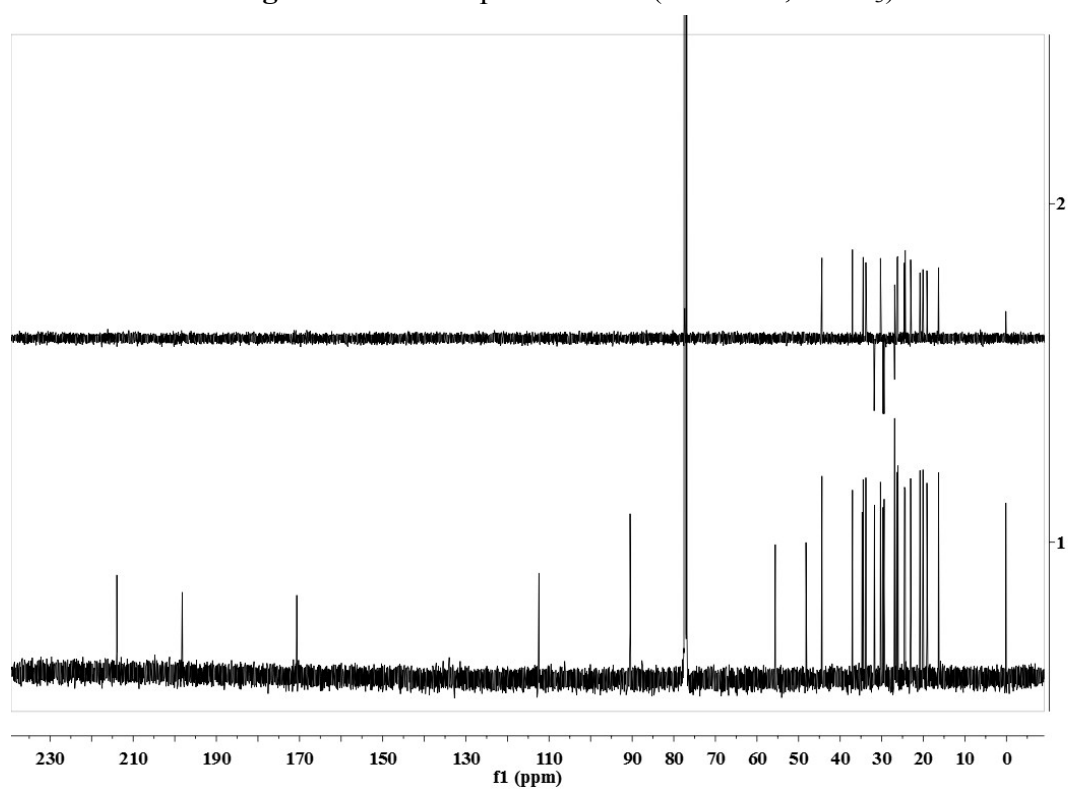

Fig. S8 DEPT-135 spectrum of **1** ( $\text{CDCl}_3$ )

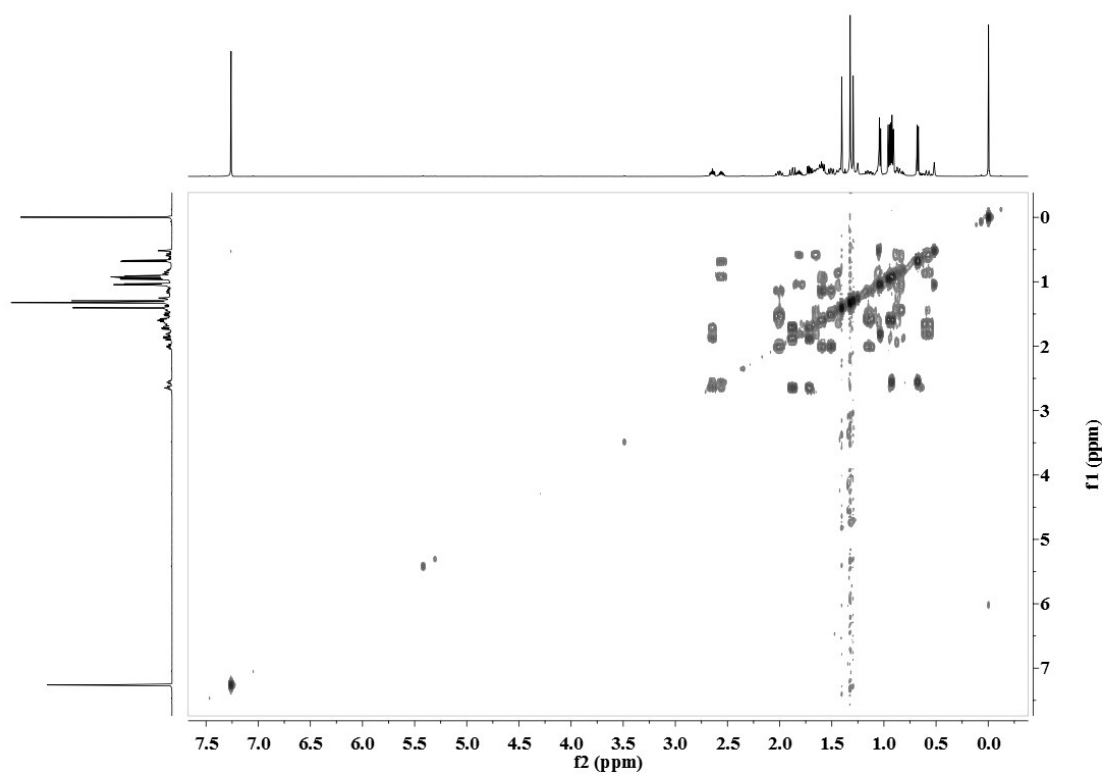

**Fig. S9**  $^1\text{H}$ - $^1\text{H}$  COSY spectrum of **1** ( $\text{CDCl}_3$ )

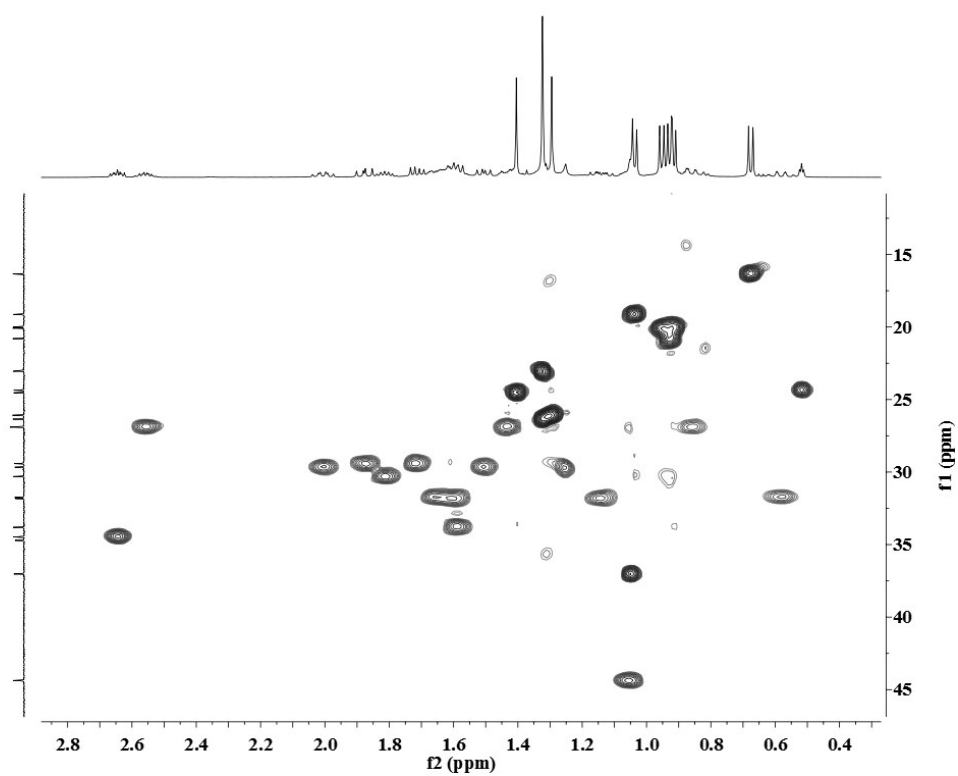

**Fig. S10** HSQC spectrum of **1** ( $\text{CDCl}_3$ )

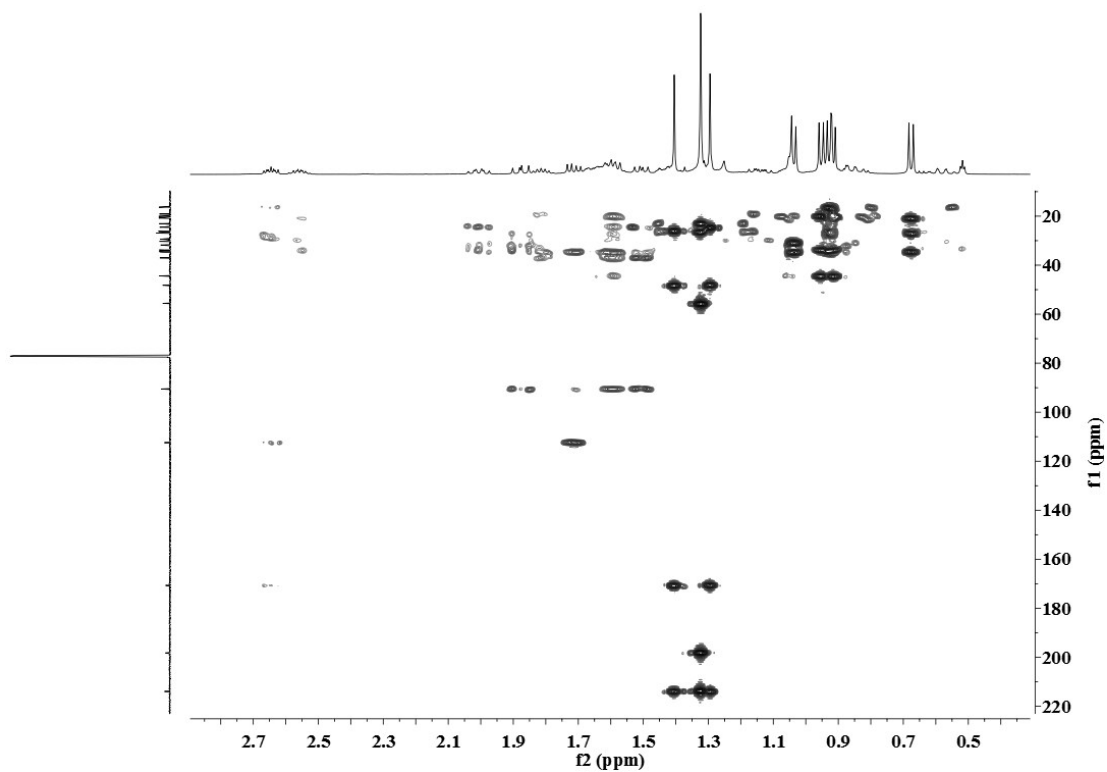

Fig. S11 HMBC spectrum of **1** (CDCl<sub>3</sub>)

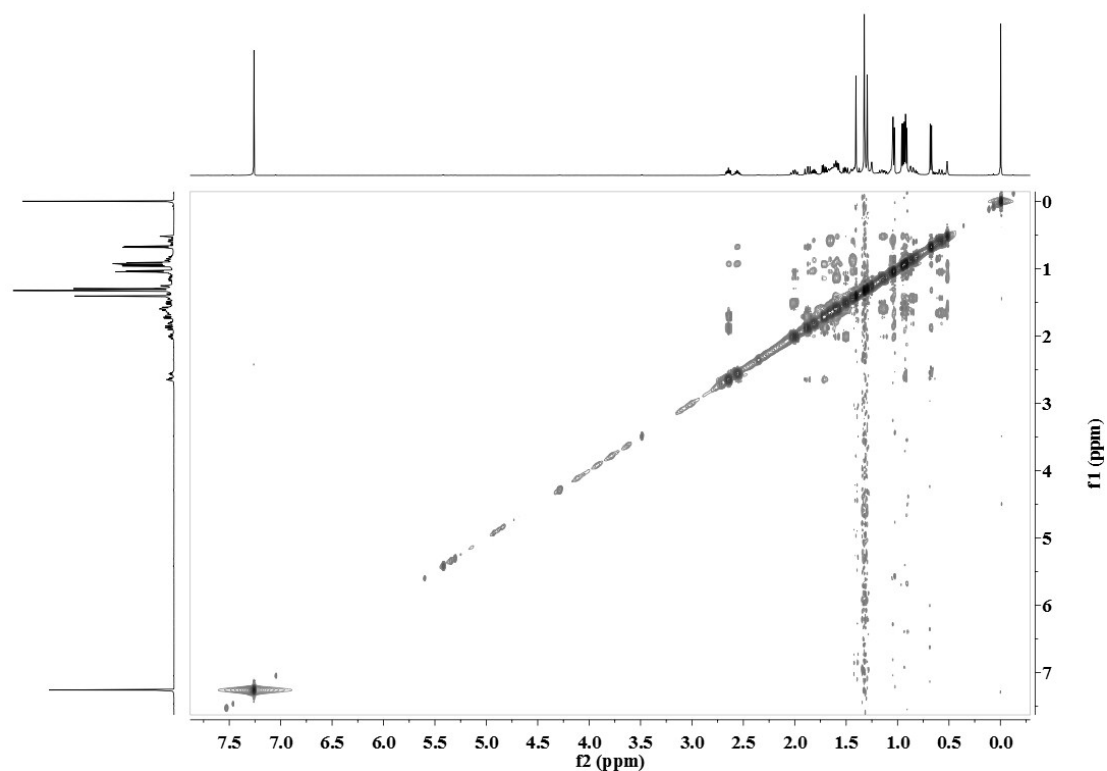

Fig. S12 NOESY spectrum of **1** (CDCl<sub>3</sub>)

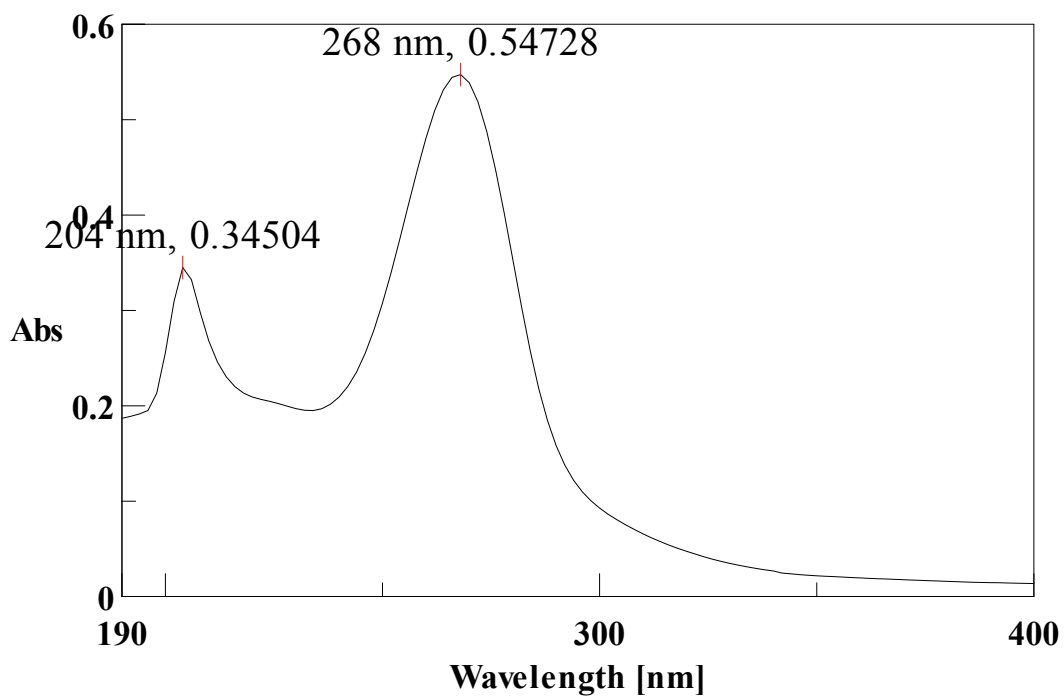

Fig. S13 UV spectrum of 2 in CH<sub>3</sub>OH

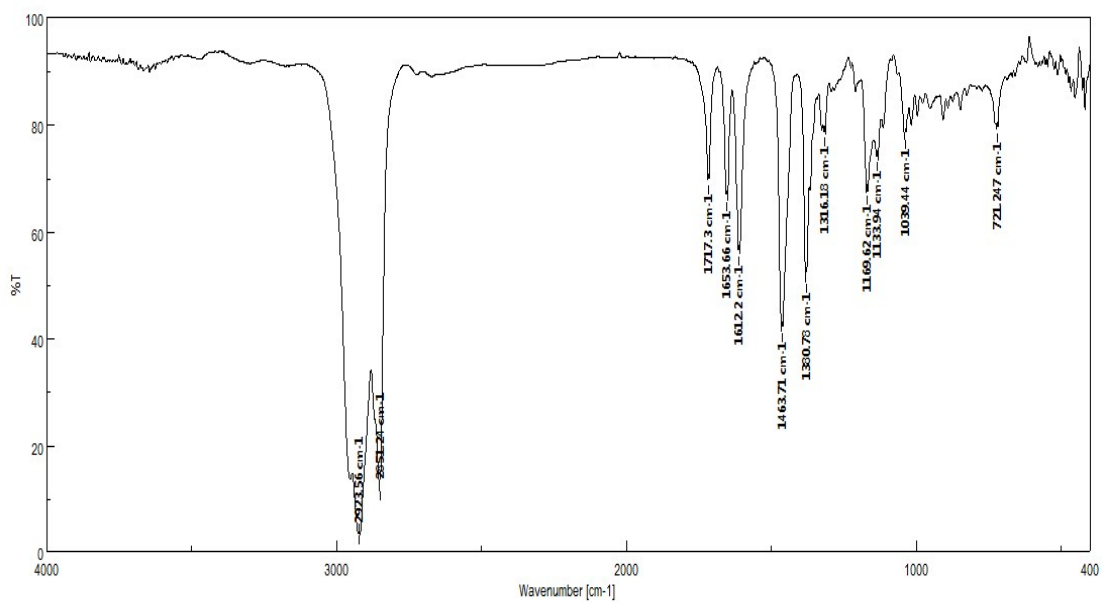

Fig. S14 IR (KBr disc) spectrum of 2

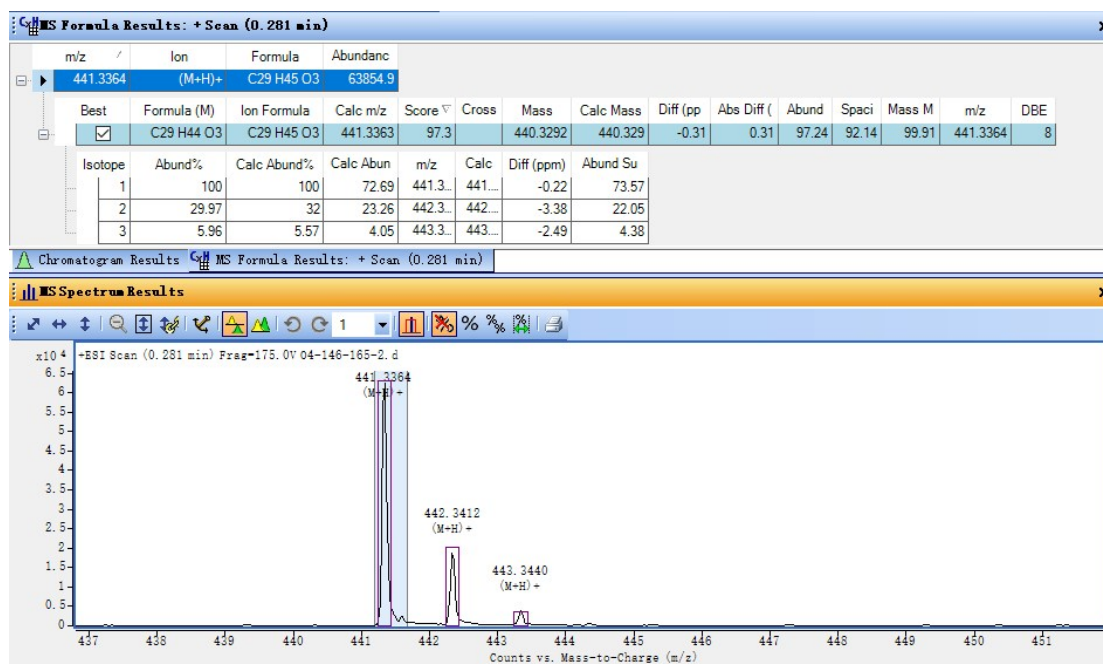

Fig. S15 HR-ESI-MS spectrum of **2**

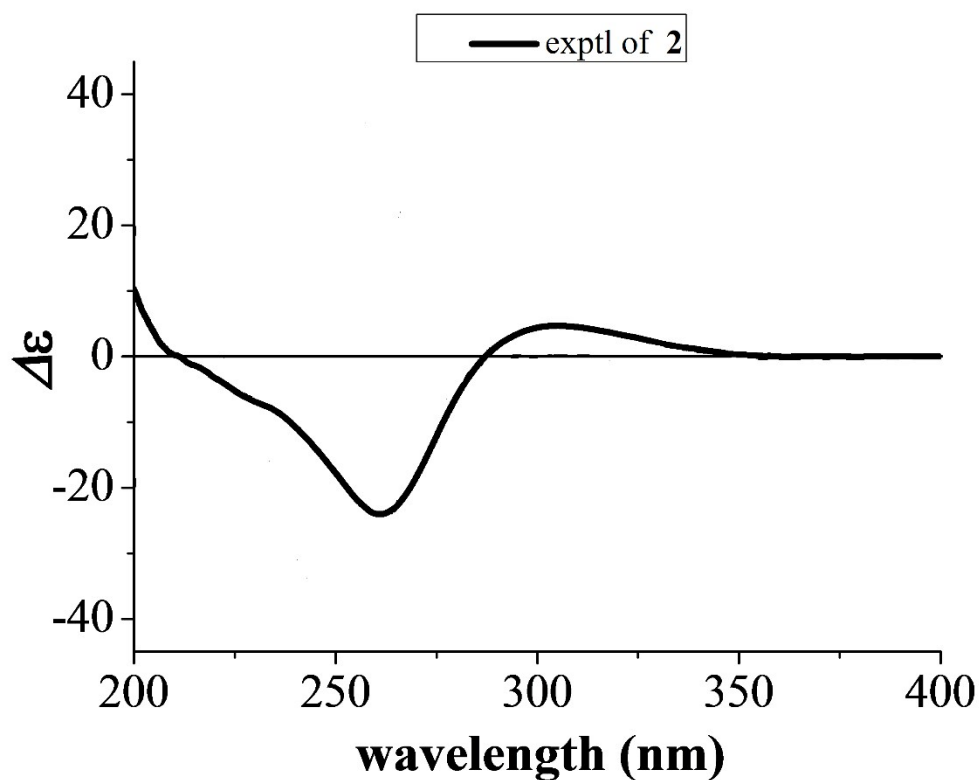

Fig. S16 CD spectrum of **2** in CH<sub>3</sub>CN

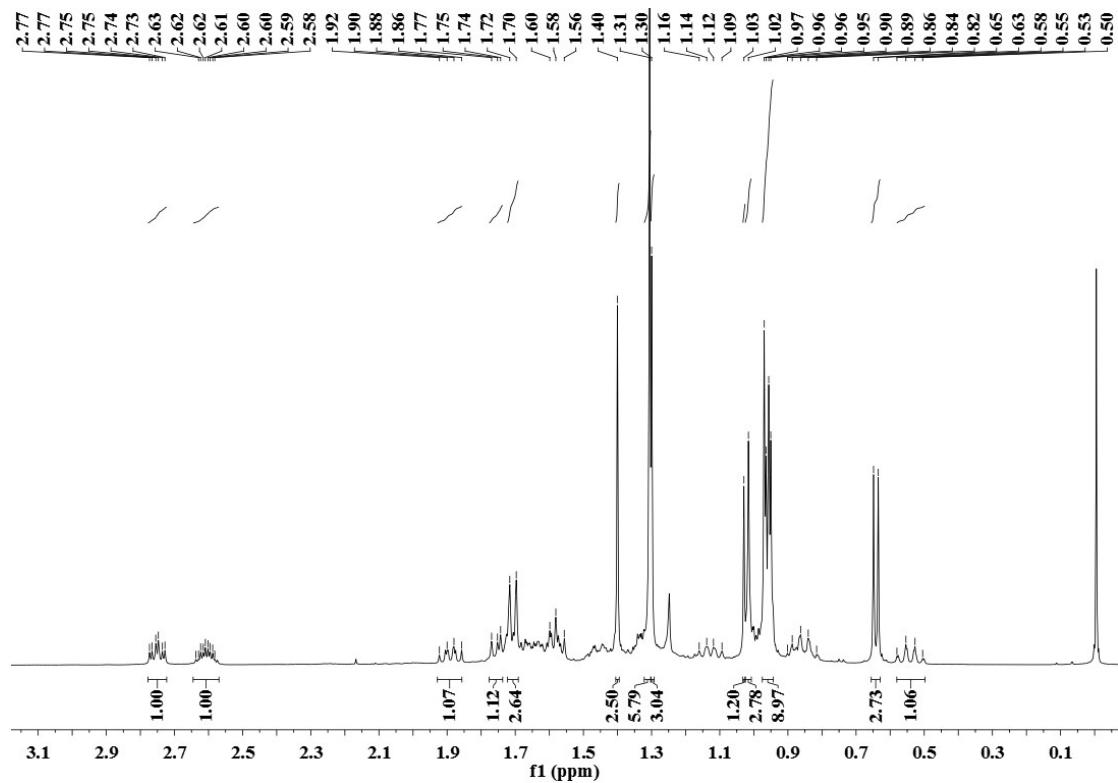

Fig. S17  $^1\text{H}$  NMR spectrum of **2** (500 MHz,  $\text{CDCl}_3$ )

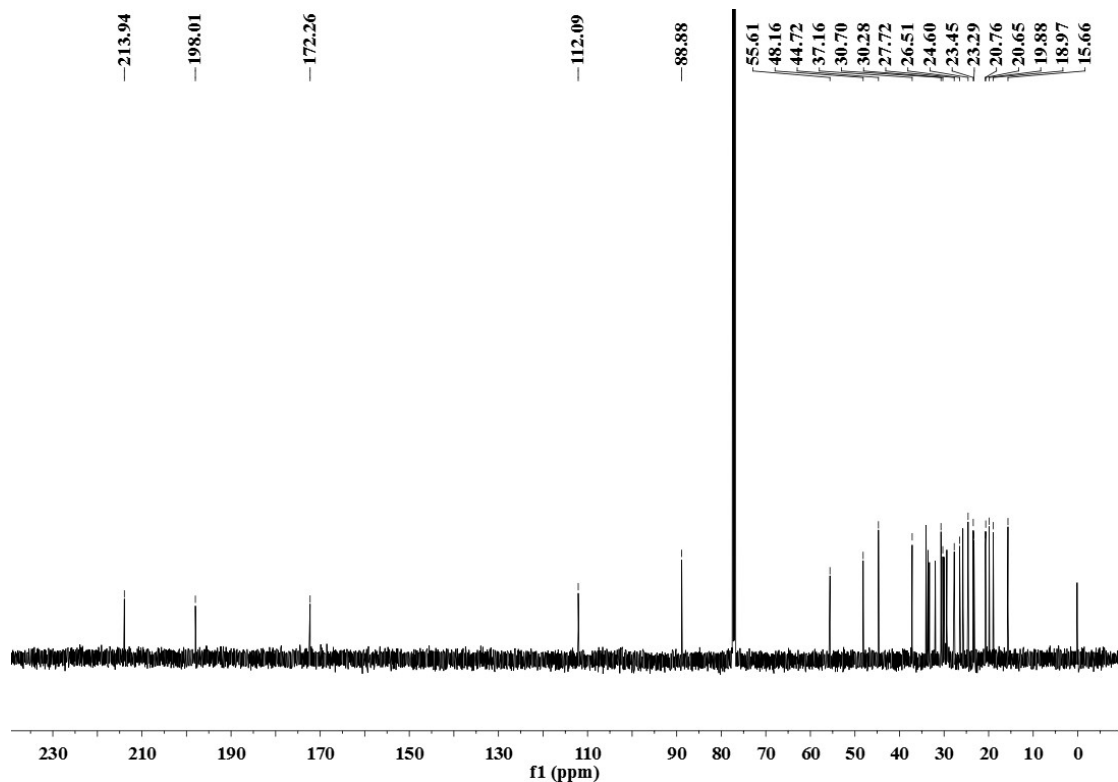

Fig. S18  $^{13}\text{C}$  NMR spectrum of **2** (125 MHz,  $\text{CDCl}_3$ )

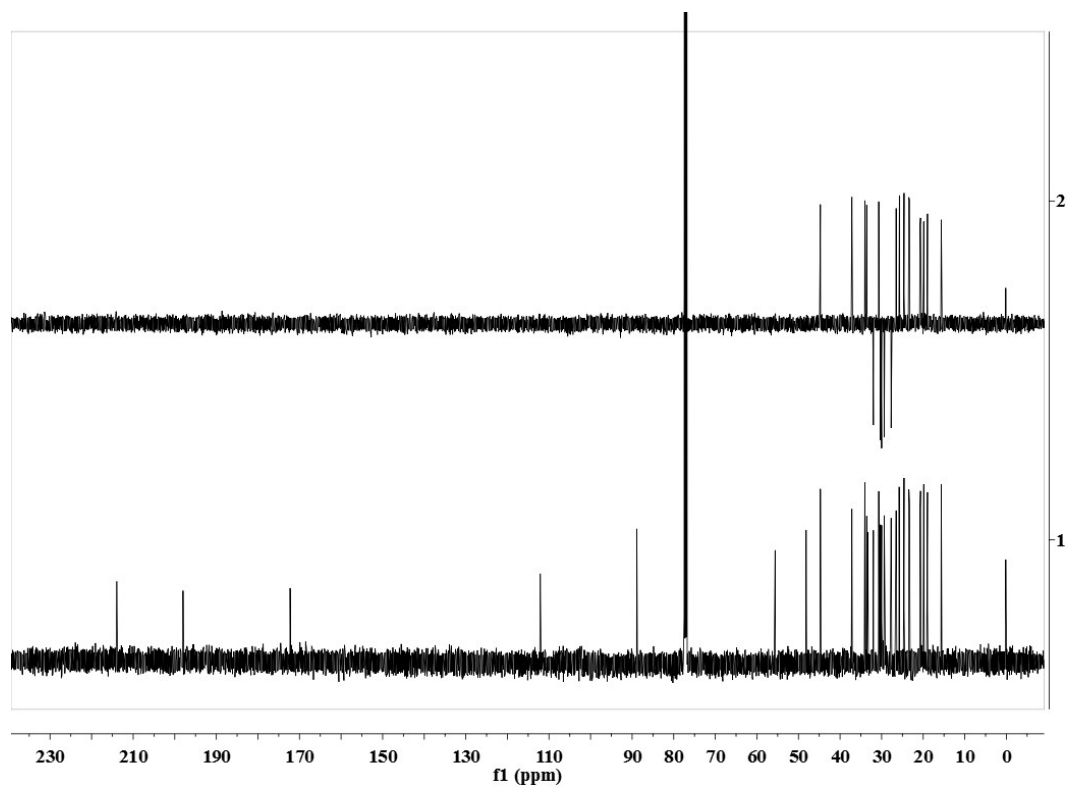

Fig. S19 DEPT-135 spectrum of **2** (CDCl<sub>3</sub>)

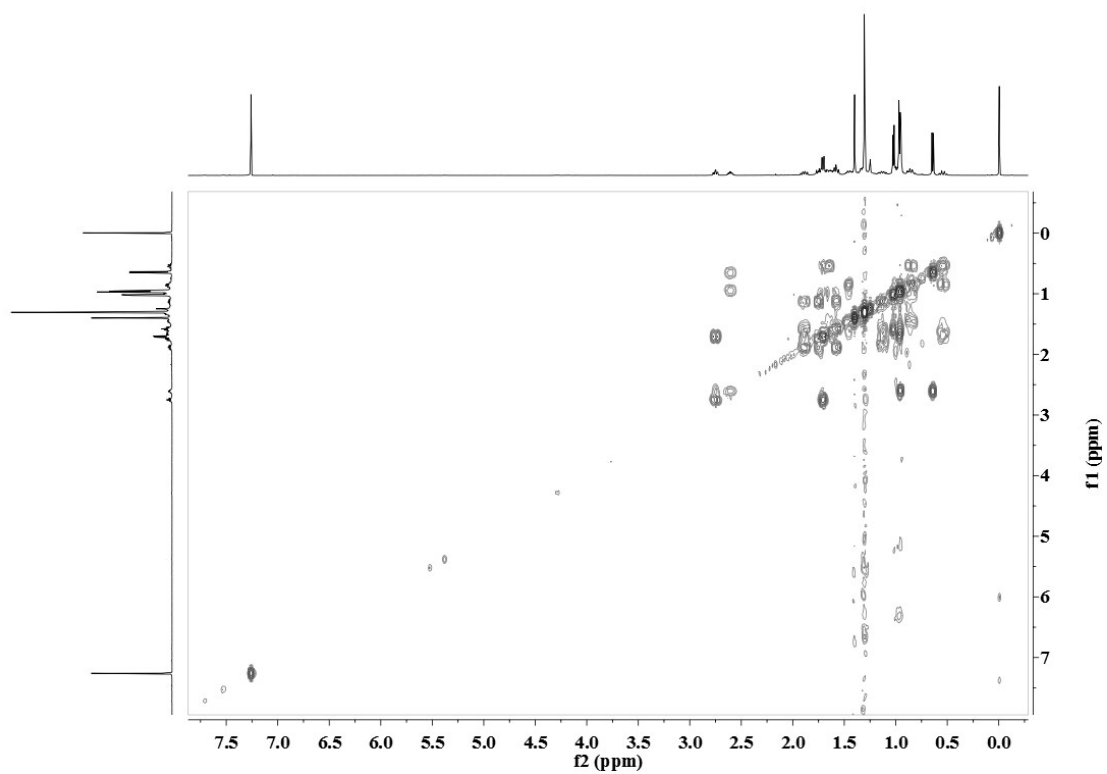

Fig. S20 <sup>1</sup>H-<sup>1</sup>H COSY spectrum of **2** (CDCl<sub>3</sub>)

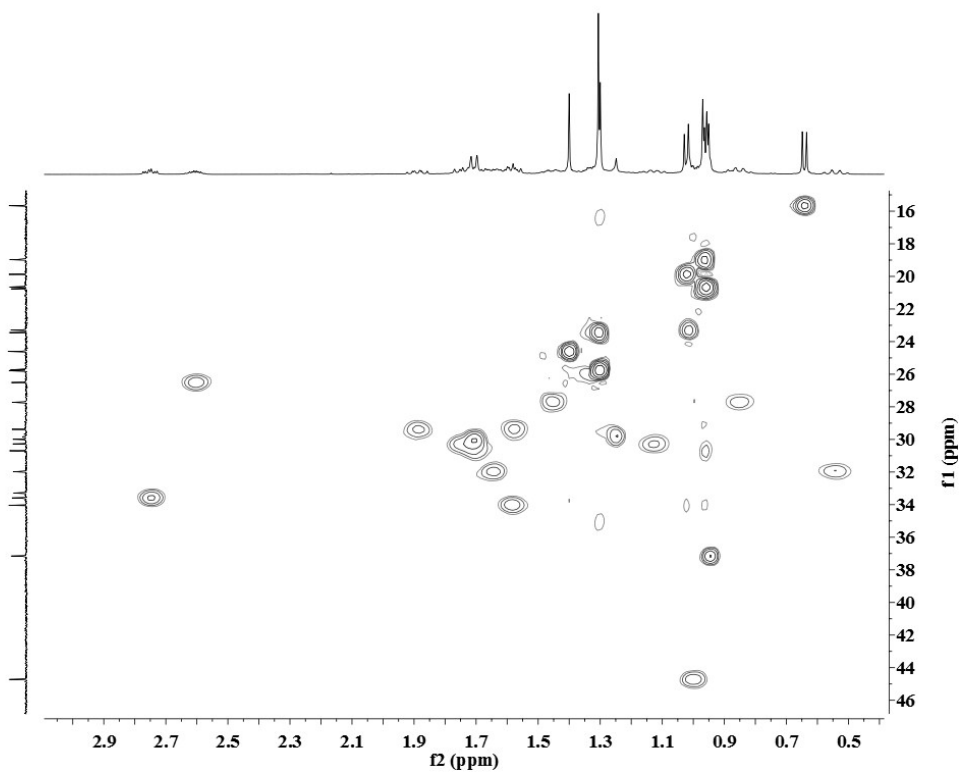

**Fig. S21** HSQC spectrum of **2** (CDCl<sub>3</sub>)

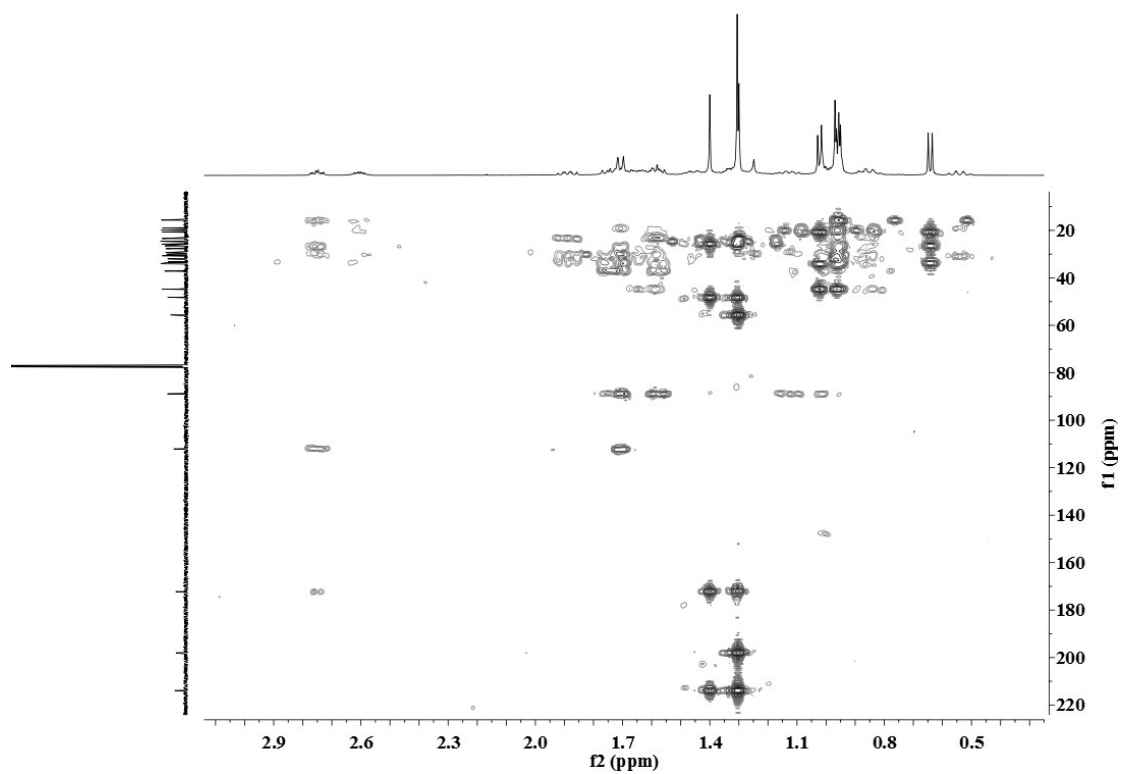

**Fig. S22** HMBC spectrum of **2** (CDCl<sub>3</sub>)



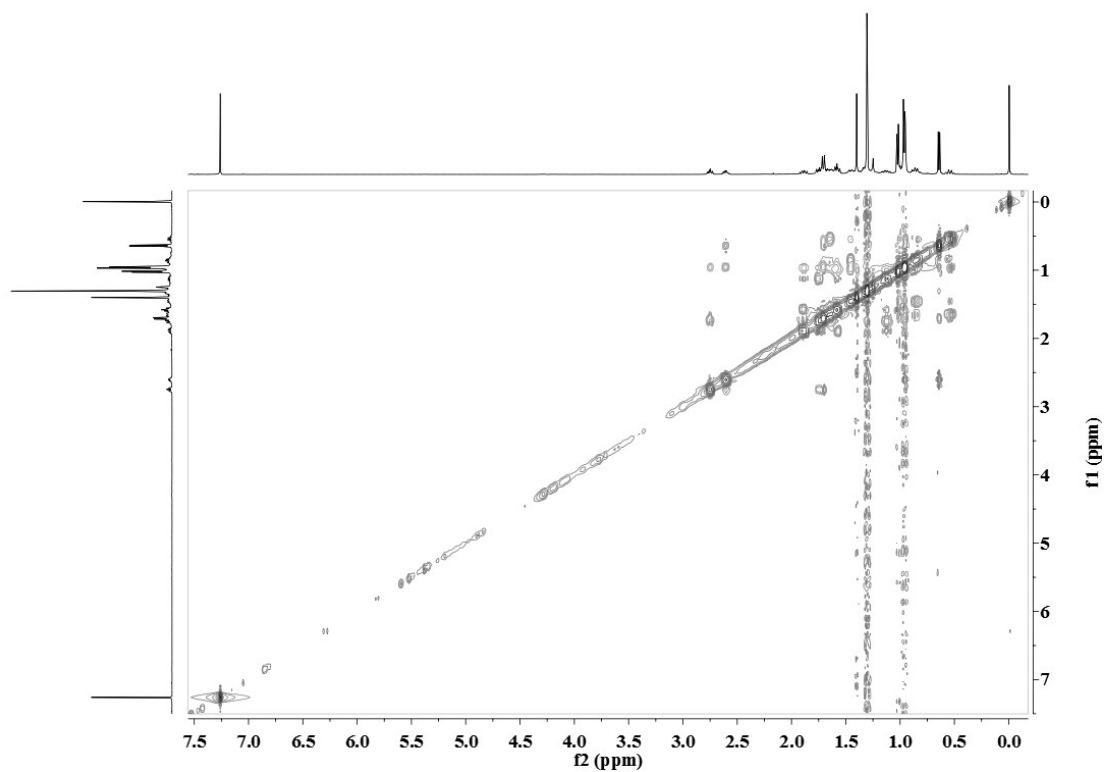

Fig. S23 NOESY spectrum of **2** ( $\text{CDCl}_3$ )

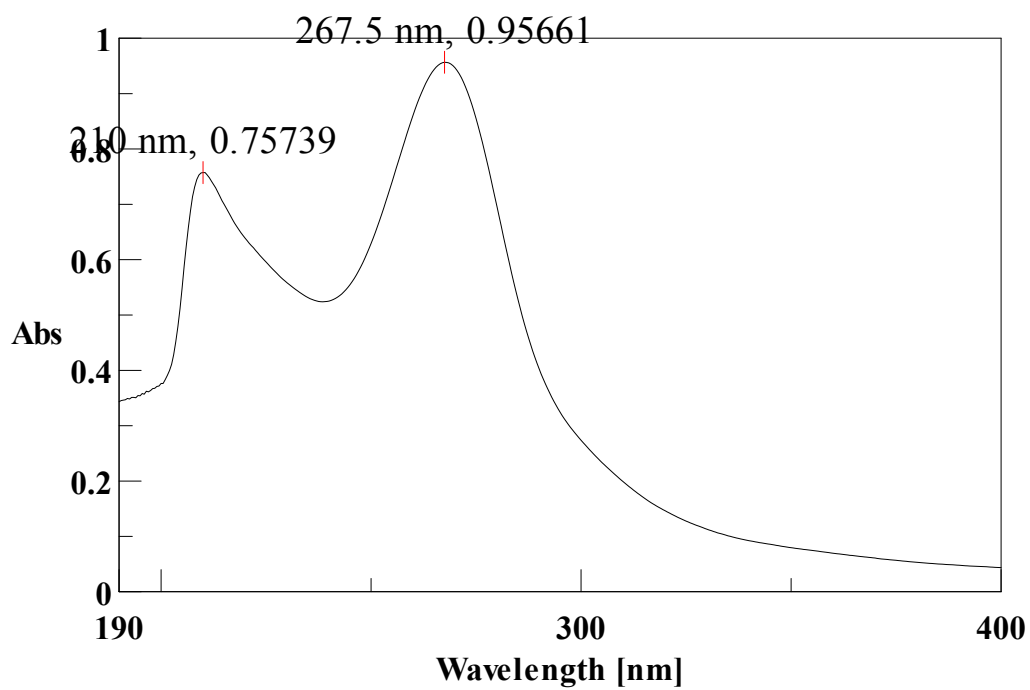

Fig. S24 UV spectrum of **3** in  $\text{CH}_3\text{OH}$

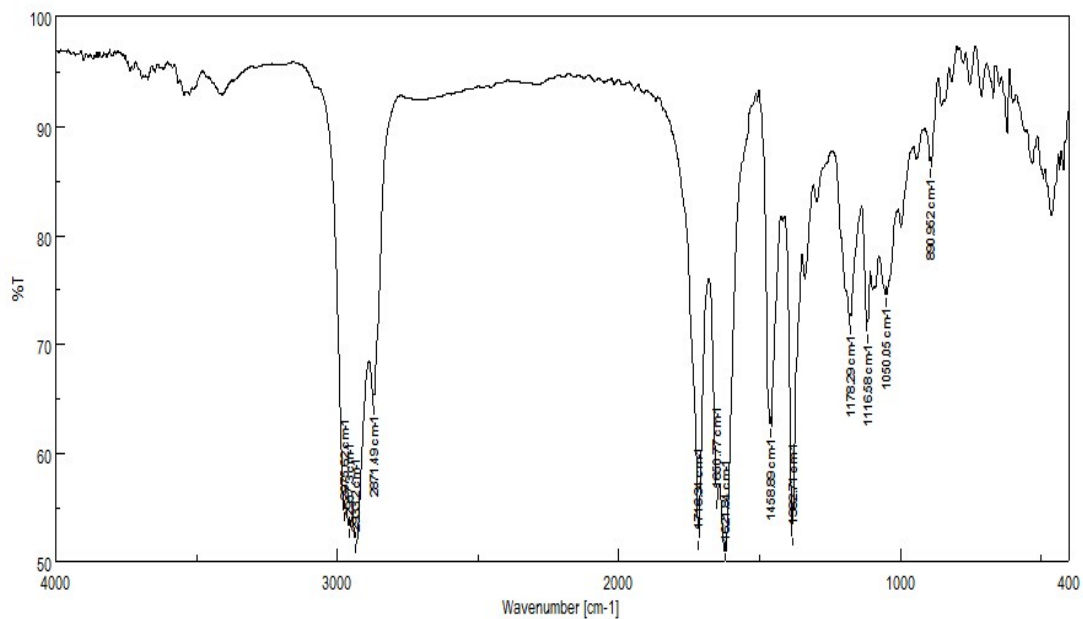

Fig. S25 IR (KBr disc) spectrum of 3

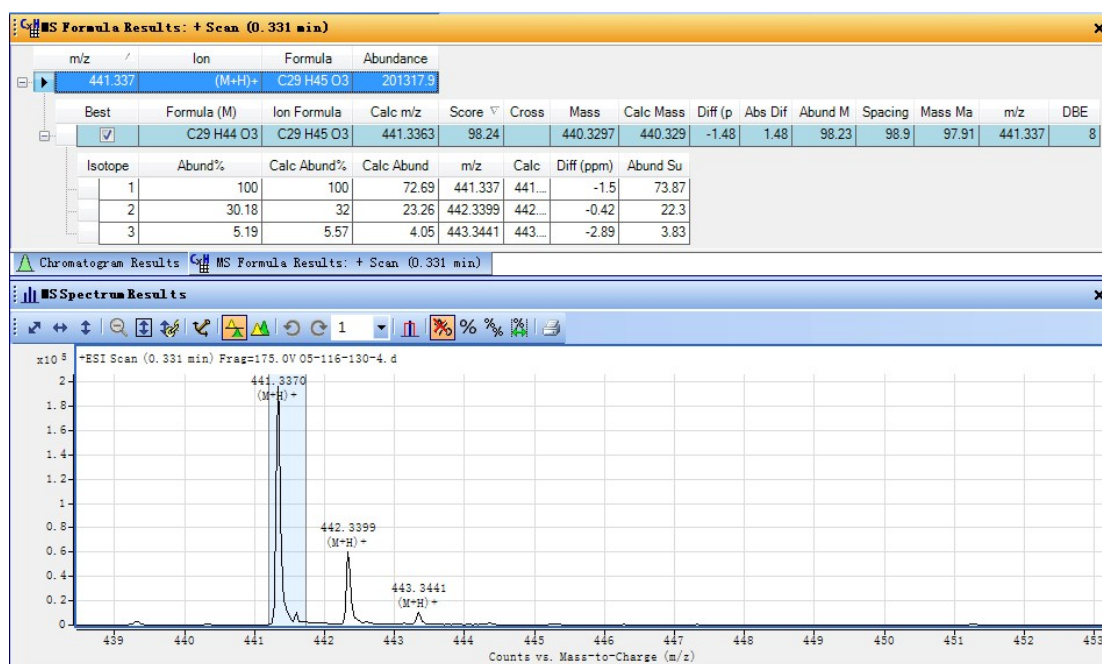

Fig. S26 HR-ESI-MS spectrum of 3

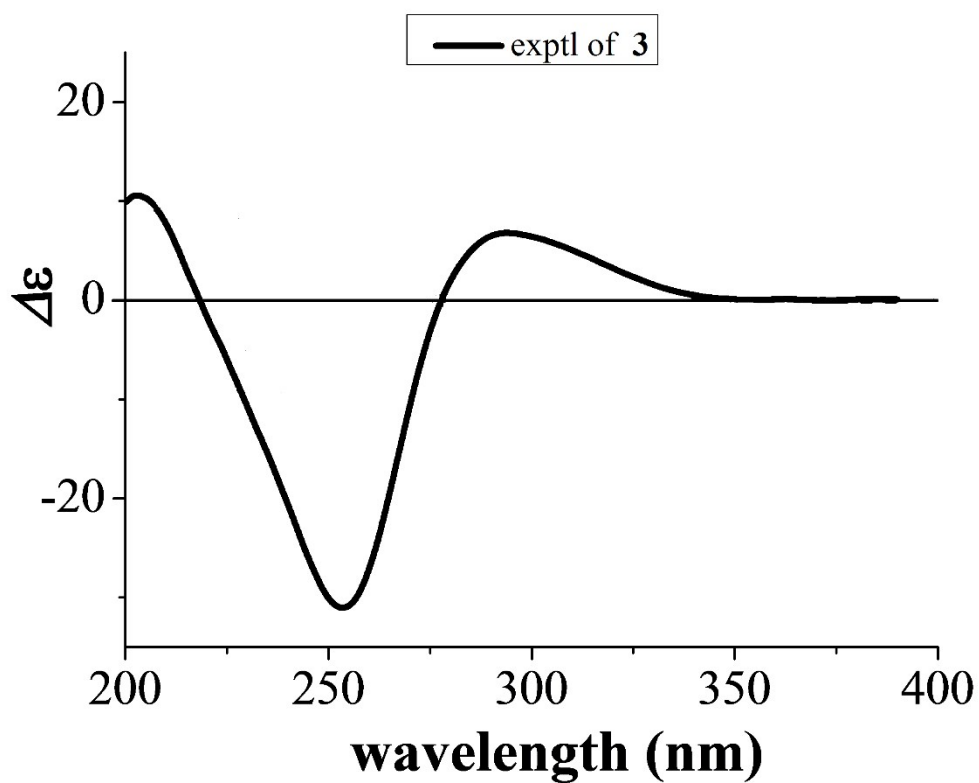

Fig. S27 CD spectrum of **3** in CH<sub>3</sub>CN

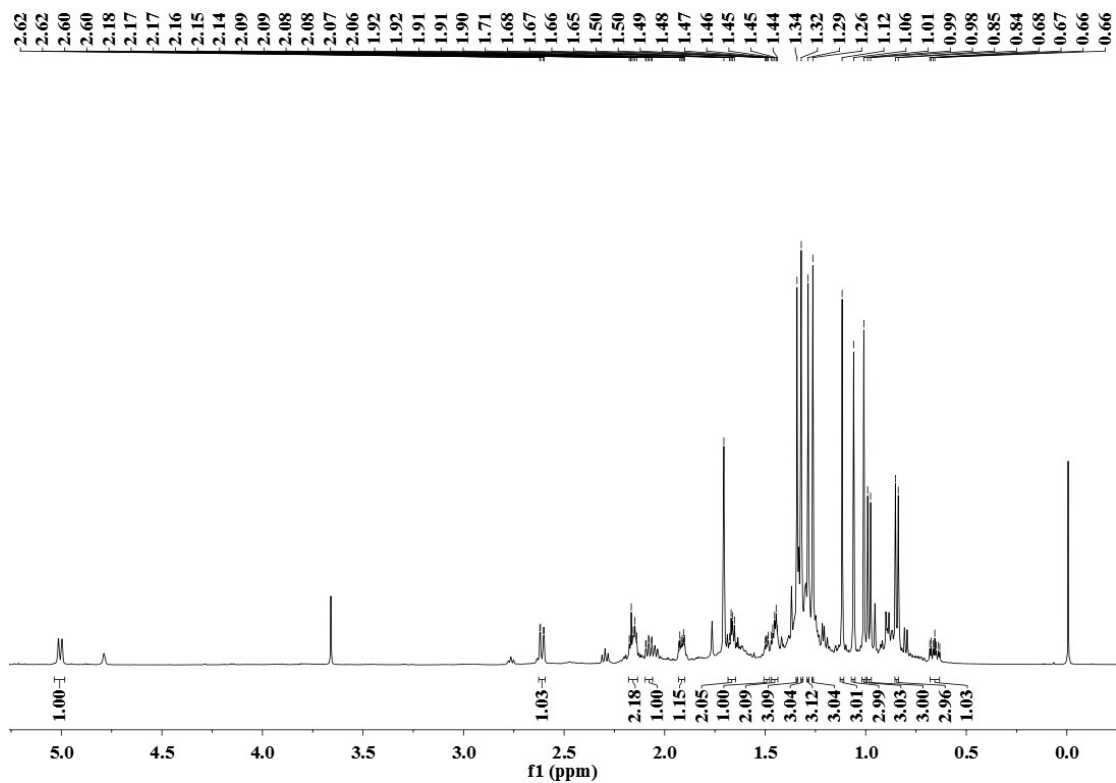

Fig. S28 <sup>1</sup>H NMR spectrum of **3** (500 MHz, CDCl<sub>3</sub>)

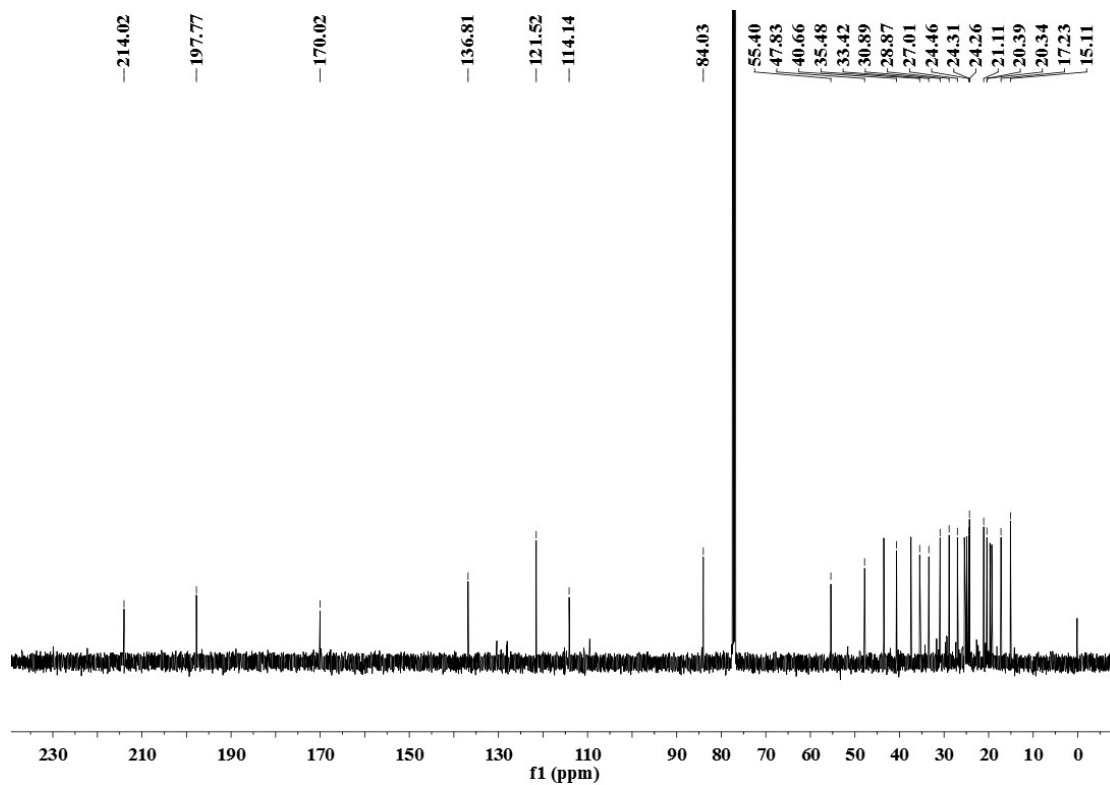

Fig. S29  $^{13}\text{C}$  NMR spectrum of **3** (125 MHz,  $\text{CDCl}_3$ )

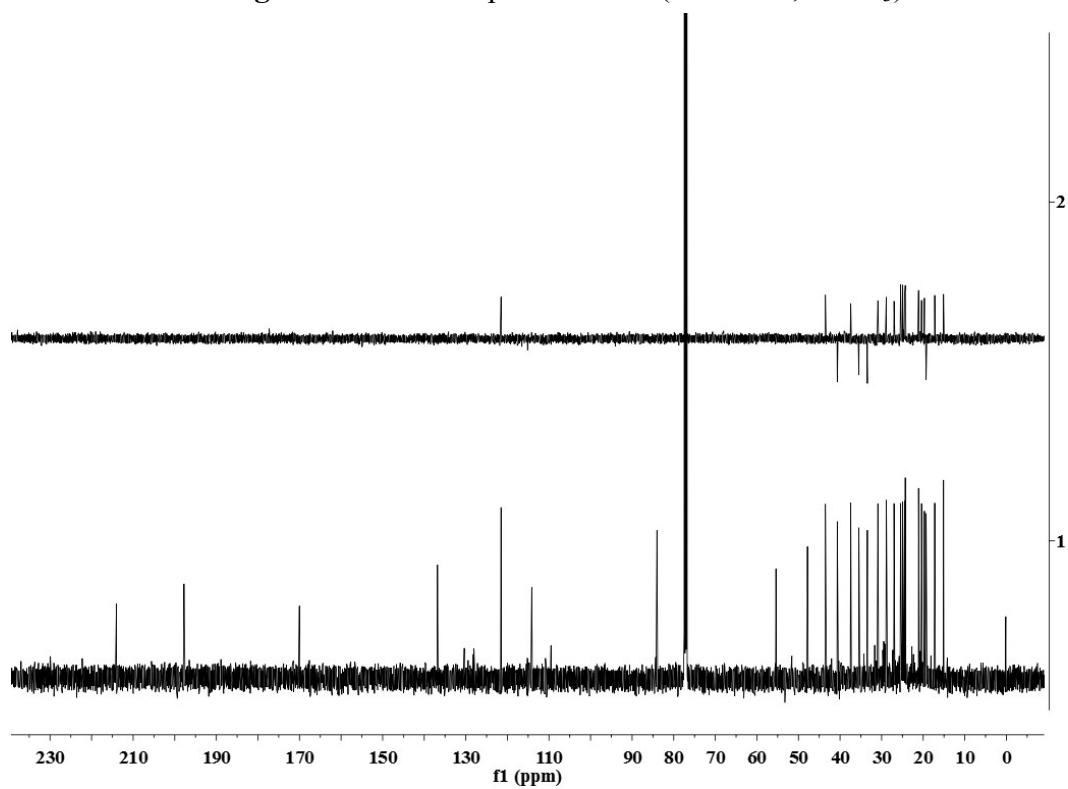

Fig. S30 DEPT-135 spectrum of **3** ( $\text{CDCl}_3$ )

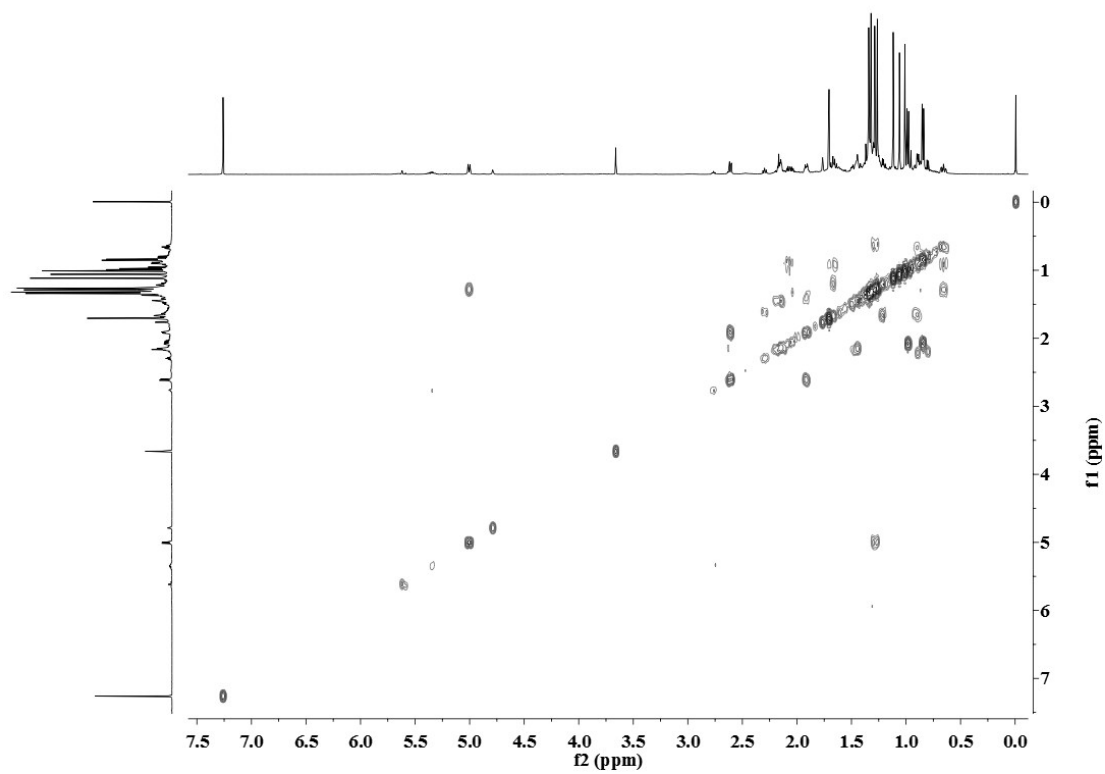

Fig. S31  $^1\text{H}$ - $^1\text{H}$  COSY spectrum of **3** ( $\text{CDCl}_3$ )

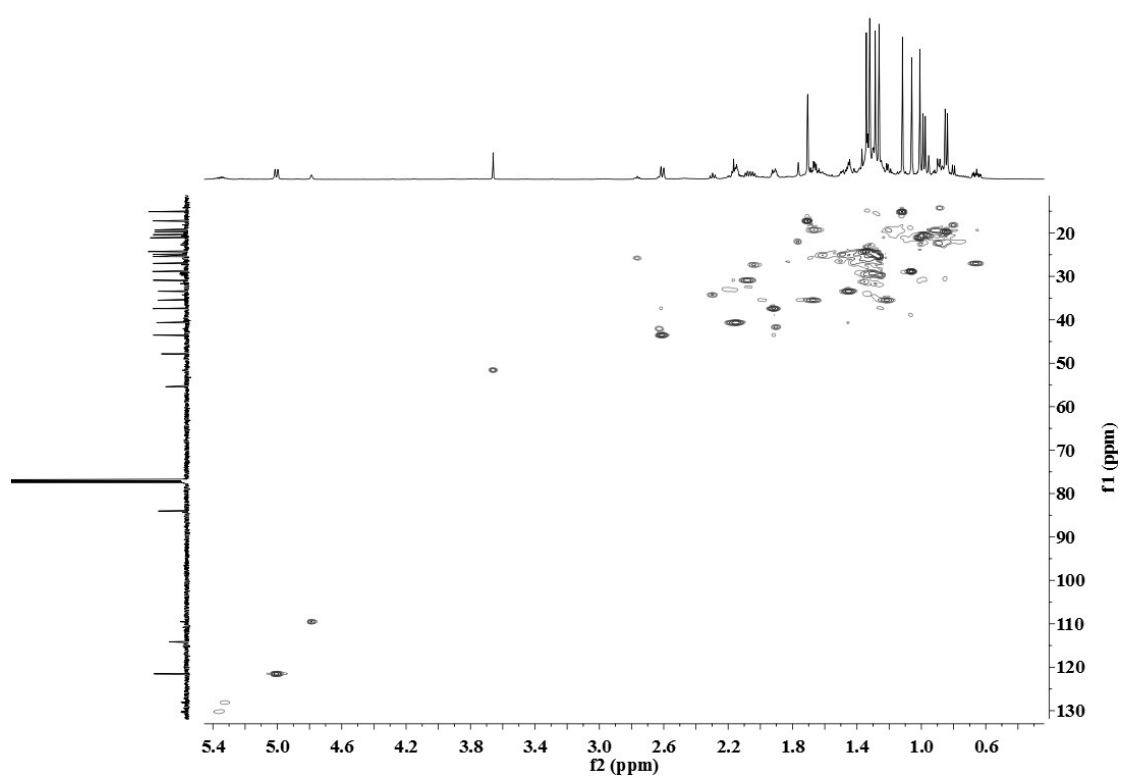

Fig. S32 HSQC spectrum of **3** ( $\text{CDCl}_3$ )

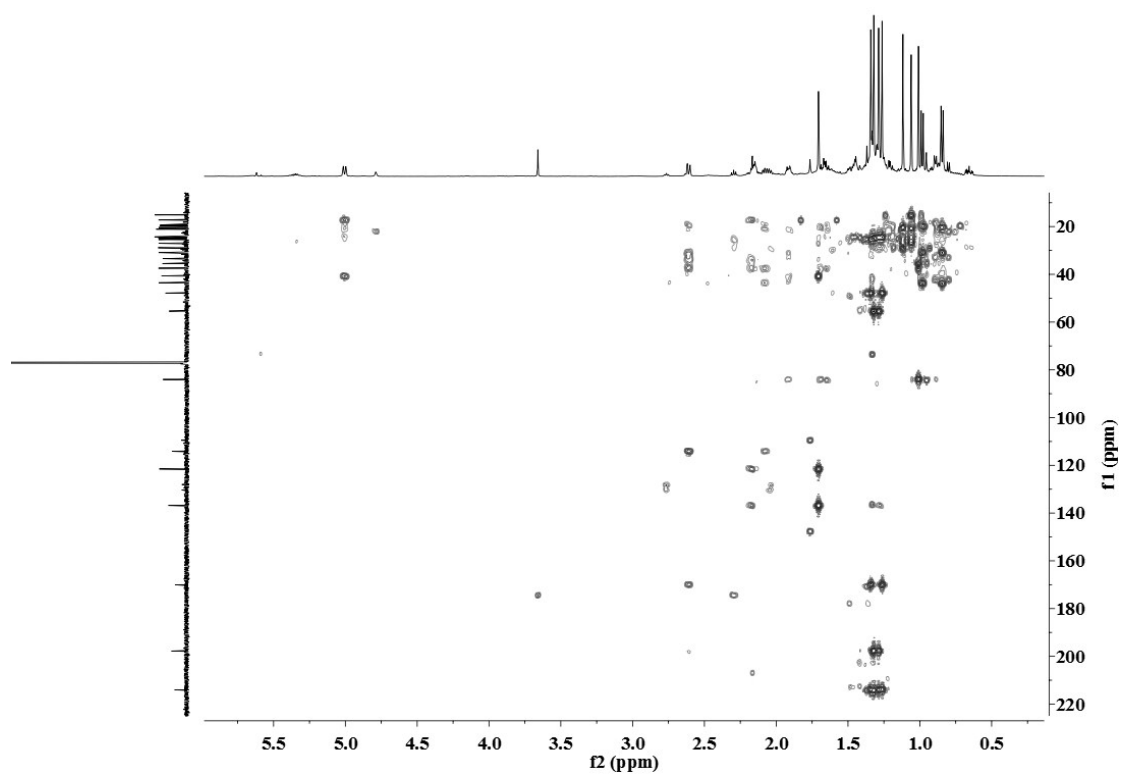

Fig. S33 HMBC spectrum of **3** (CDCl<sub>3</sub>)

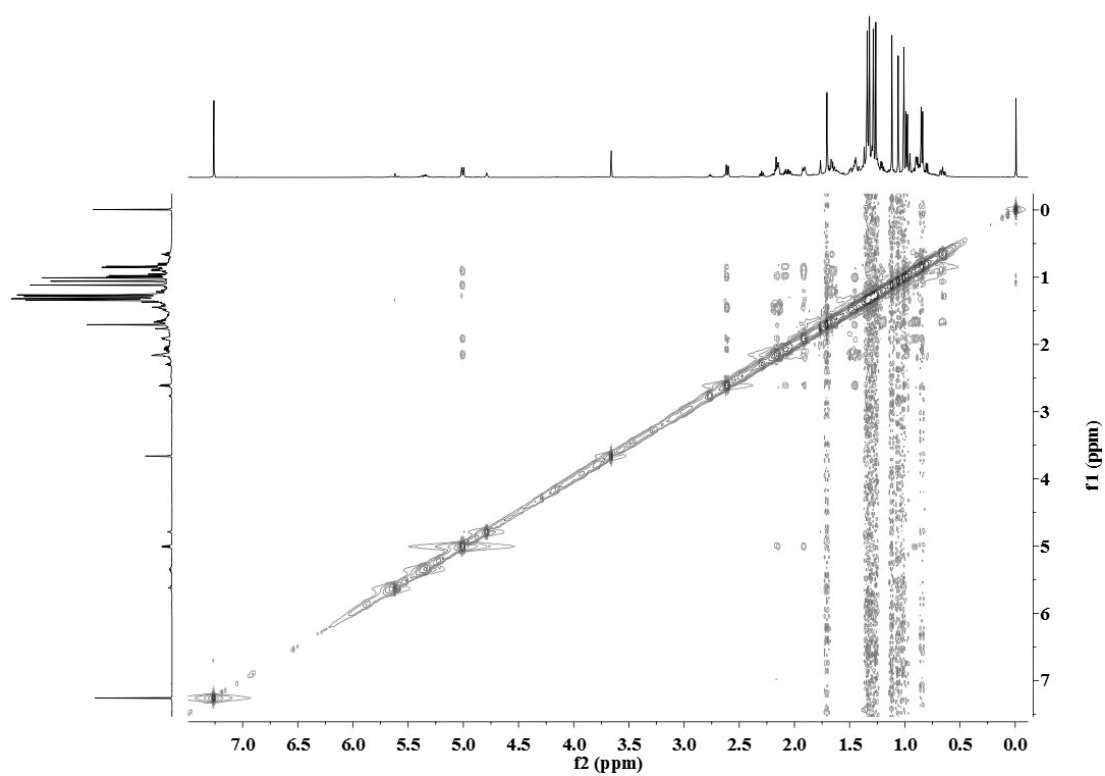

Fig. S34 NOESY spectrum of **3** (CDCl<sub>3</sub>)

### 3. Purity analysis of 1-7 for biological test

**Table S3** The purities of 1-7 calculated by area normalization method

| Compounds | Wavelength (nm) |        |        |        |
|-----------|-----------------|--------|--------|--------|
|           | 210             | 230    | 254    | 280    |
| <b>1</b>  | 99.46%          | 99.42% | 99.55% | 99.57% |
| <b>2</b>  | 99.06%          | 99.50% | 99.54% | 99.55% |
| <b>3</b>  | 98.51%          | 98.64% | 99.99% | 99.99% |
| <b>4</b>  | 99.83%          | 99.99% | 99.99% | 99.99% |
| <b>5</b>  | 99.86%          | 99.99% | 99.99% | 99.99% |
| <b>6</b>  | 98.80%          | 96.76% | 99.77% | 99.70% |
| <b>7</b>  | 98.67%          | 96.22% | 99.59% | 99.42% |

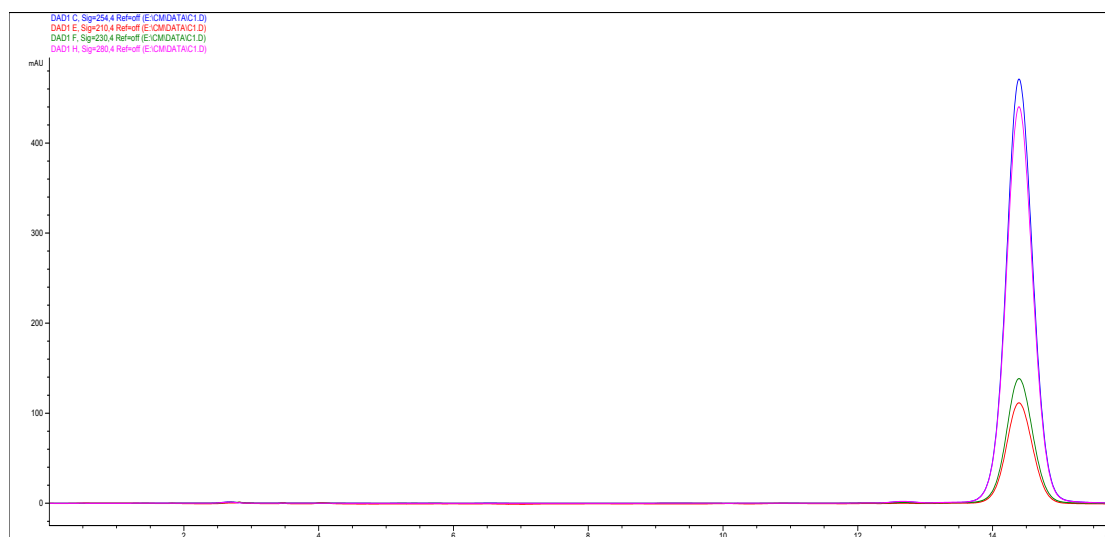

CH<sub>3</sub>OH-H<sub>2</sub>O, 95:5 Rt: 14.39 min

**Fig. S35** HPLC analysis of **1**

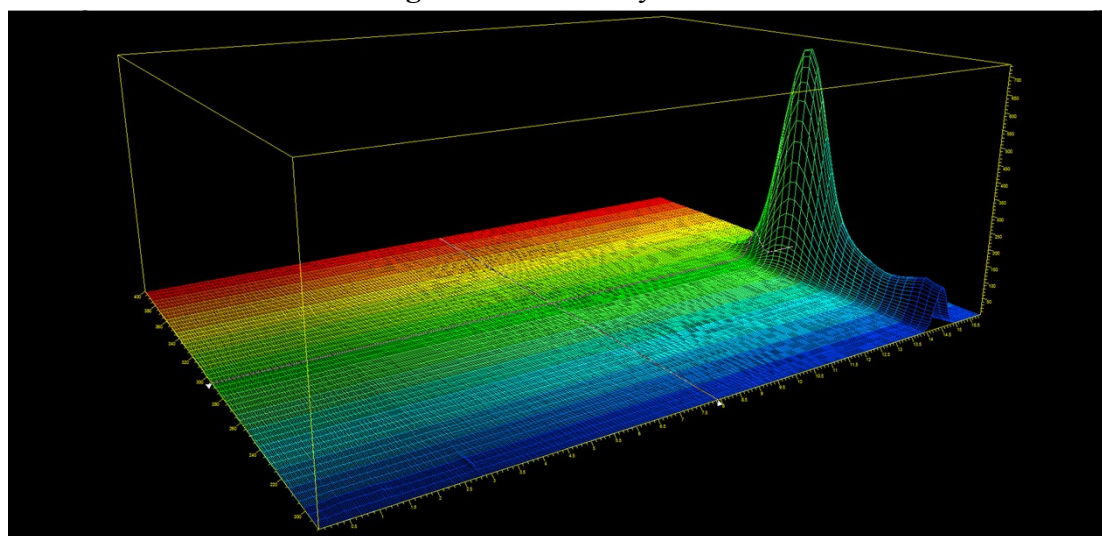

**Fig. S36** HPLC analysis 3D spectrum of **1**

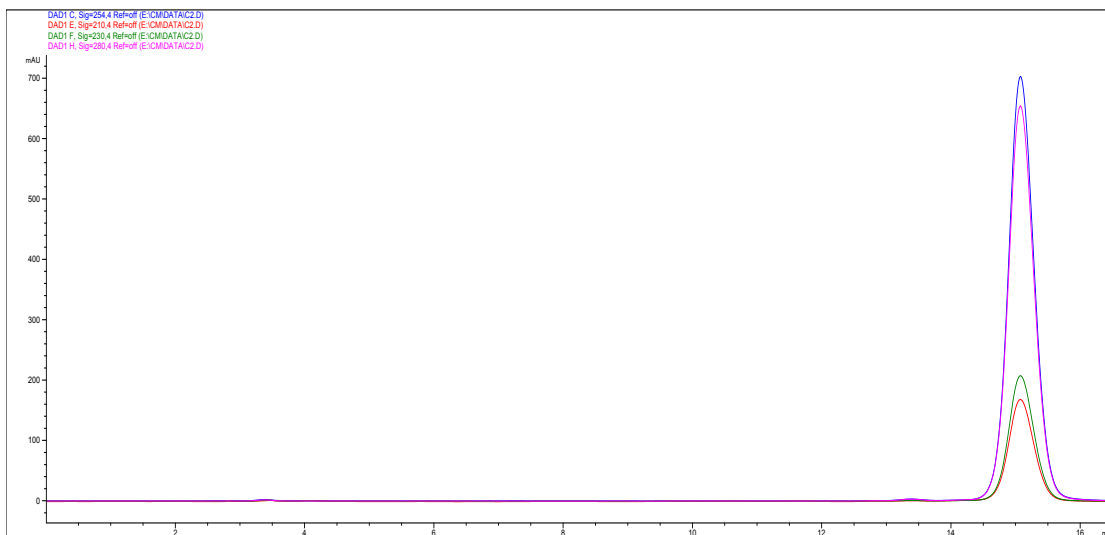

CH<sub>3</sub>OH-H<sub>2</sub>O, 95:5 Rt: 15.08 min

**Fig. S37** HPLC analysis of **2**

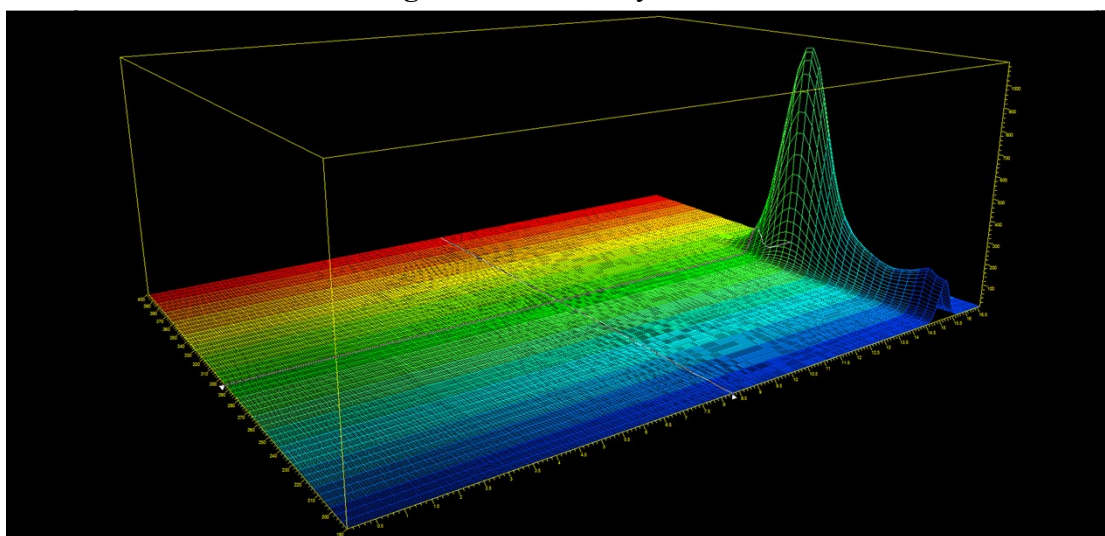

**Fig. S38** HPLC analysis 3D spectrum of **2**

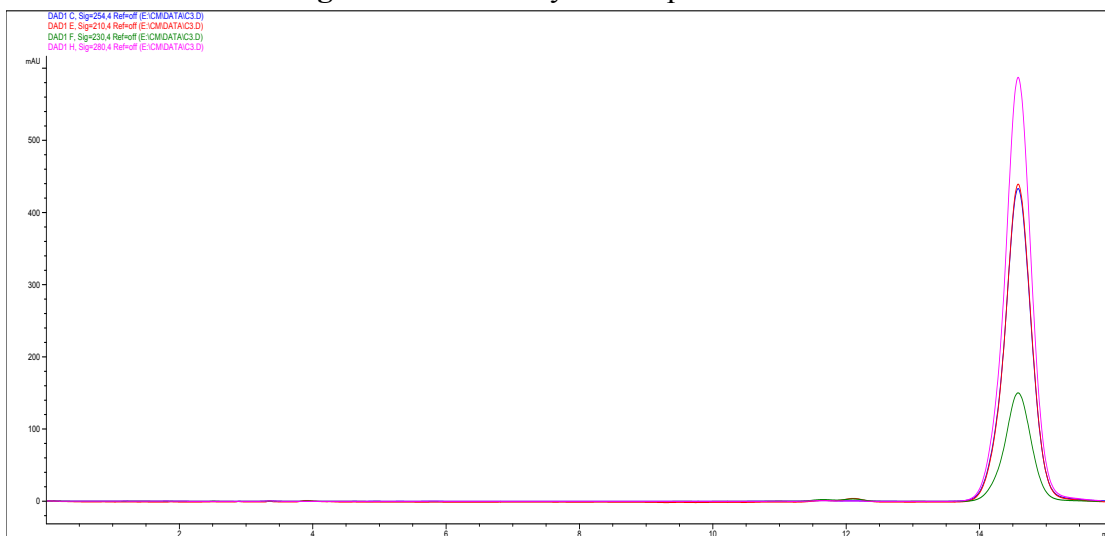

CH<sub>3</sub>OH-H<sub>2</sub>O, 95:5 Rt: 14.85 min

**Fig. S39** HPLC analysis of **3**



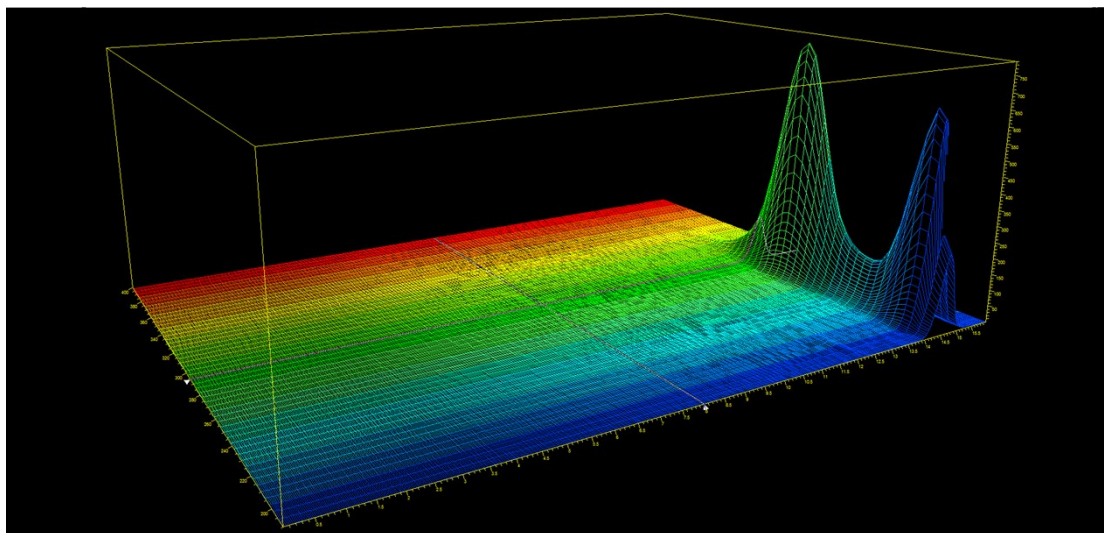

**Fig. S40** HPLC analysis 3D spectrum of **3**

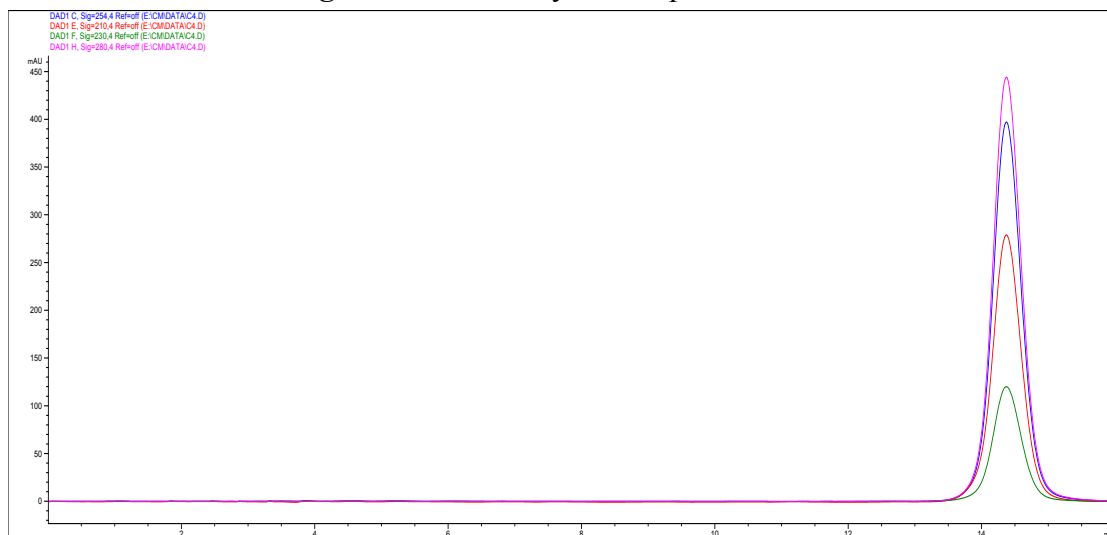

CH<sub>3</sub>OH-H<sub>2</sub>O, 90:10 Rt: 14.37 min

**Fig. S41** HPLC analysis of **4**

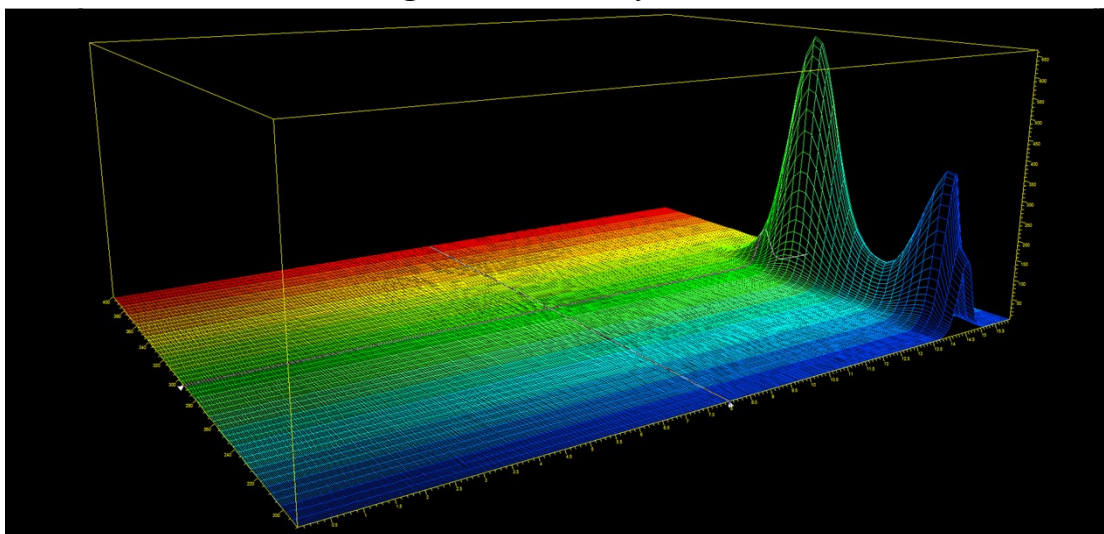

**Fig. S42** HPLC analysis 3D spectrum of **4**

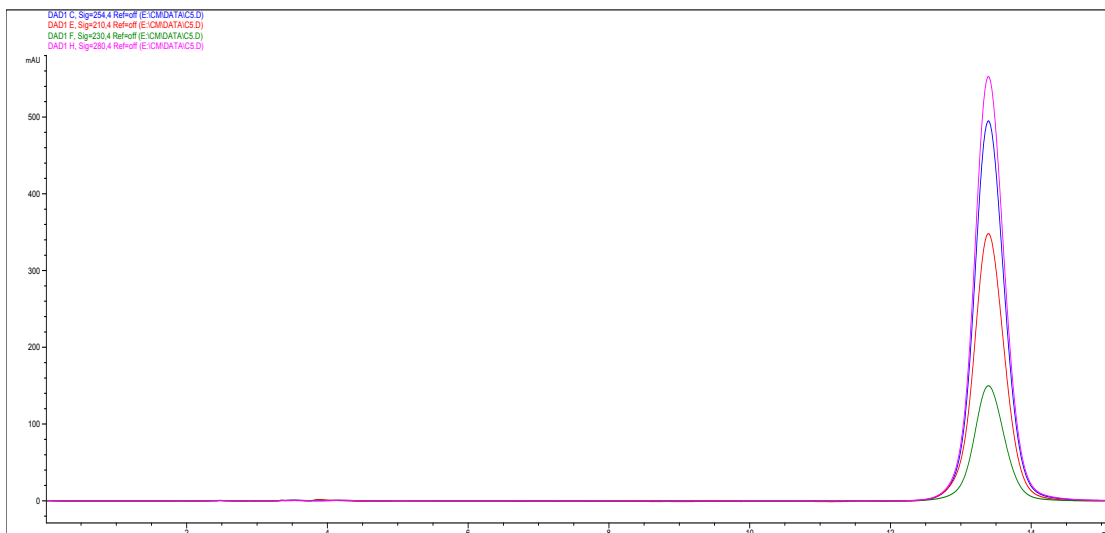

CH<sub>3</sub>OH-H<sub>2</sub>O, 92:8 Rt: 13.39 min

**Fig. S43 HPLC analysis of 5**

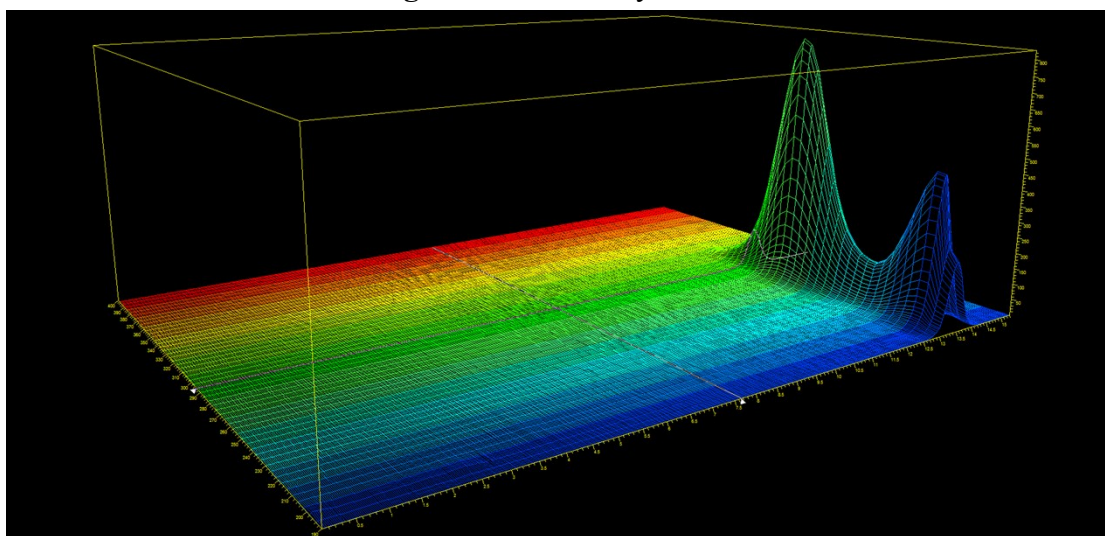

**Fig. S44 HPLC analysis 3D spectrum of 5**

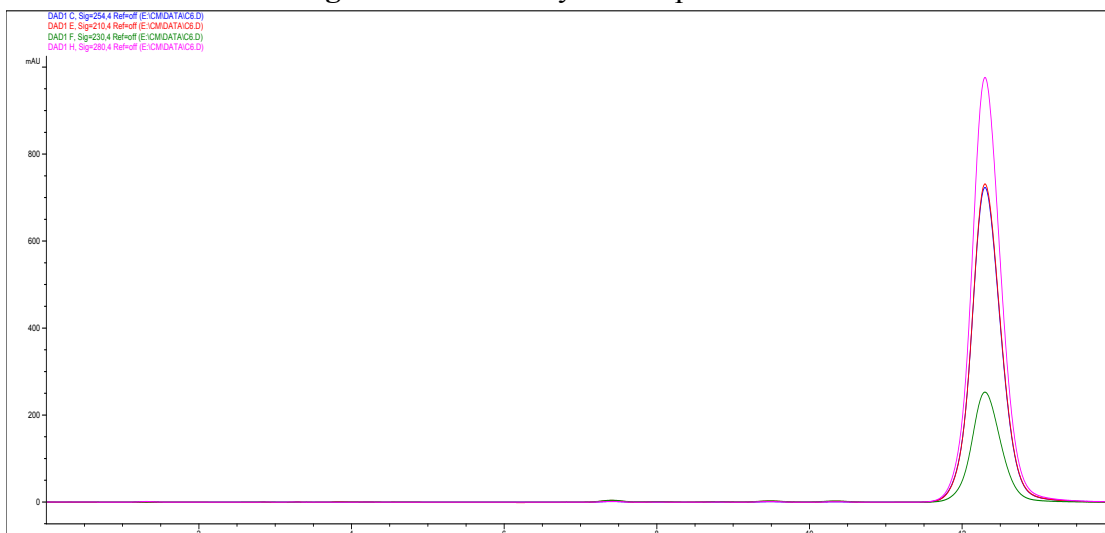

CH<sub>3</sub>OH-H<sub>2</sub>O, 90:10 Rt: 12.30 min

**Fig. S45 HPLC analysis of 6**

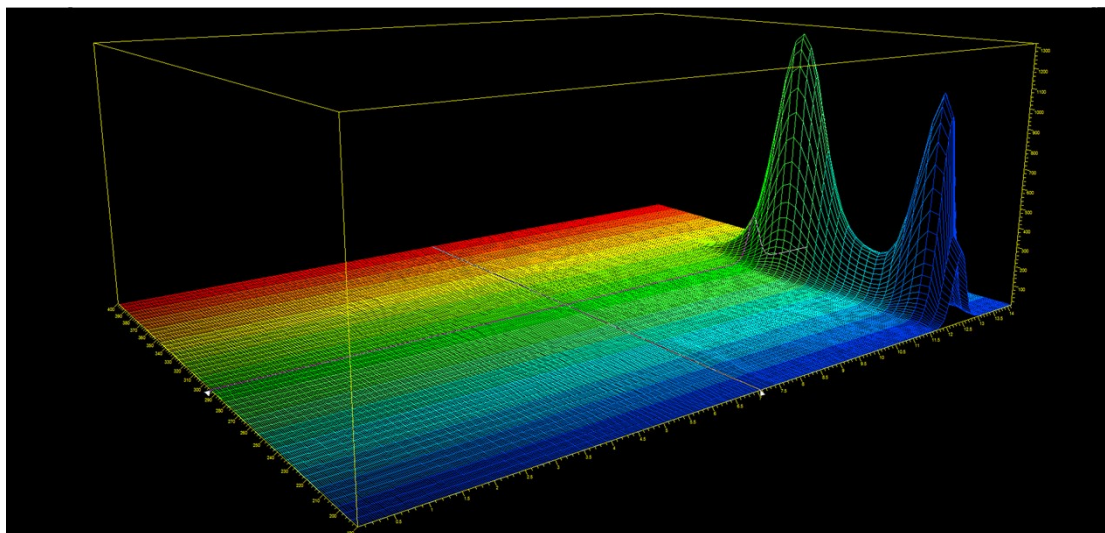

**Fig. S46** HPLC analysis 3D spectrum of **6**

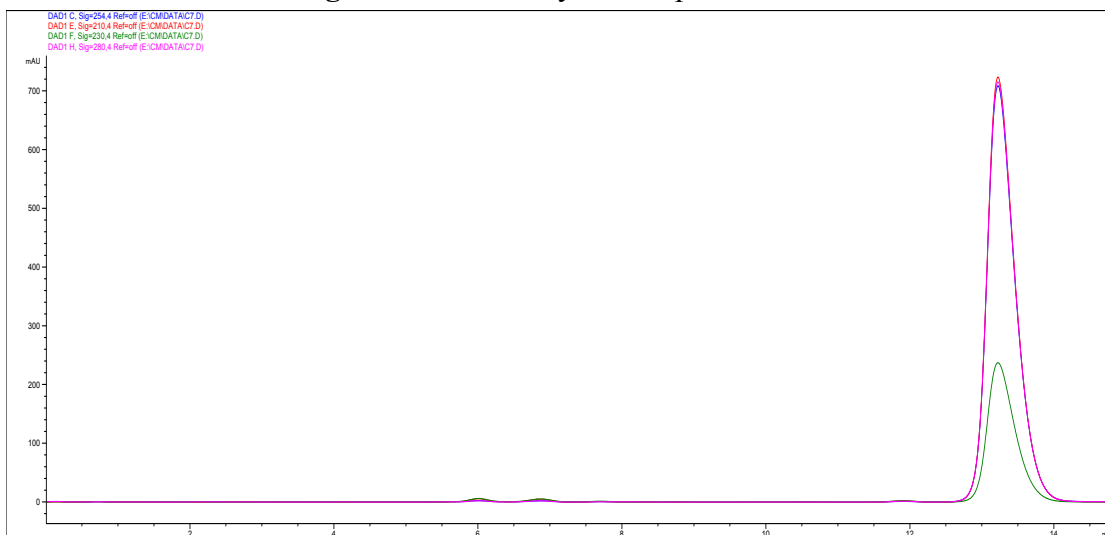

CH<sub>3</sub>CN-H<sub>2</sub>O, 92:8 Rt: 13.22 min

**Fig. S47** HPLC analysis of **7**

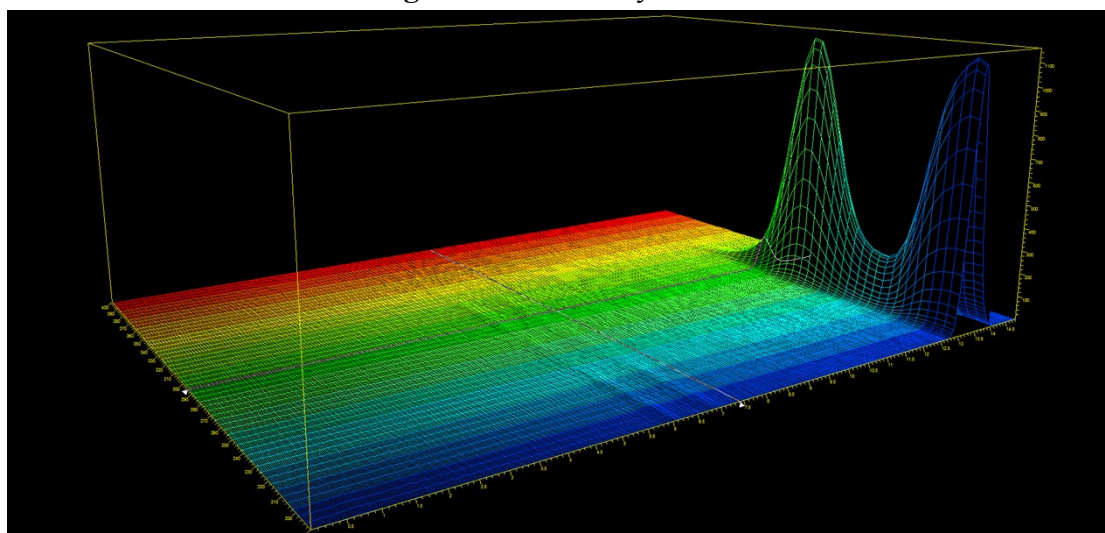

**Fig. S48** HPLC analysis 3D spectrum of **7**
